1 **Evidence-based gene expression modulation correlates with transposable element knock-**  
2 **down**

3

4 José Hernandez-Lopes<sup>1\*</sup>, Danielle M. Quintanilha<sup>1\*</sup>, Erika M. de Jesus<sup>1</sup>, Fabrício M. Lopes<sup>2</sup>,  
5 Raphael B. Parmigiani<sup>3,4</sup>, Bruno Karolski<sup>1,5</sup>, Henrique M. Dias<sup>1</sup>, Thomas B. Jacobs<sup>6</sup>, Anamaria  
6 A. Camargo<sup>3,7</sup>, João P. Kitajima<sup>8</sup> and Marie-Anne Van Sluys<sup>1\*\*</sup>.

7

8 <sup>1</sup>Departamento de Botânica, Universidade de São Paulo, São Paulo, Brazil. <sup>2</sup>Universidade  
9 Federal Tecnológica do Paraná, Cornélio Procopio, Brazil. <sup>3</sup>Ludwig Institute for Cancer  
10 Research, São Paulo, Brazil. <sup>4</sup>Idengene Medicina Diagnóstica, São Paulo, Brazil. <sup>5</sup>Laboratório  
11 de Simulação e Controle de Processos (LSCP-POLI-USP), São Paulo, Brazil. <sup>6</sup>Center for Plant  
12 Systems Biology, VIB, Ghent, Belgium. <sup>7</sup>Centro de Oncologia Molecular, Hospital Sírio-  
13 Libanês, São Paulo, Brazil. <sup>8</sup>Mendelics Análise Genômica, São Paulo, Brazil.

14 \* Both authors contributed equally to this work

15 \*\*Correspondence: mavsluys@usp.br

16

17 **ABSTRACT**

18 **Background:** Transposable elements (TEs) are major components of plant genomes. Despite  
19 being regarded as “junk DNA” at first, TEs play important roles for the organisms they are  
20 found in. The most obvious and easily recognizable effects caused by TEs result from their  
21 mobility, which can disrupt coding sequences or promoter regions. However, with the recent  
22 advances in transcriptomics, it is becoming increasingly evident that TEs can act as an  
23 additional layer of gene expression regulation through a number of processes, which can  
24 involve production of non-coding RNAs. Here, we describe how Tnt1, a stress-responsive LTR-  
25 retrotransposon, interferes with gene expression and modulate a number of developmental  
26 aspects in tobacco.

27 **Results:** Through an RNAi approach, we generated tobacco (HP) lines knocked-down for Tnt1  
28 expression. Quantitative RT-PCR experiments confirm that Tnt1 is downregulated in HP lines  
29 after ethylene exposure. A RNA-seq experiment was performed and through two independent  
30 bioinformatic approaches (with different stringencies) we found 932 and 97 differentially  
31 expressed genes in HP lines. A number of phenotypes were observed in such lines, namely  
32 lesion mimicry in leaves, underdevelopment of the root system, overproduction of root hairs and  
33 early loss of seed viability. Folding prediction of part of the Tnt1 mRNA reveals putative stem-  
34 loop secondary structures containing transcriptional regulation sequences, suggesting it could be  
35 a source of small RNAs. We also propose a model to explain the Tnt1 expression in both  
36 homeostatic and stress conditions, and how it could interact with stress-responsive genes.

37 **Conclusions:** Our results are consistent that interferences with Tnt1 transcript levels correlate  
38 with transcriptomic and phenotypic changes, suggesting a functional role for this element during  
39 plant development and stress response.

40

41 **Keywords:** ethylene, transcriptome, retrotransposon, Tnt1, tobacco, RNAi

42

## 43 **BACKGROUND**

44 Most genomes harbor a particular type of genetic elements collectively known as  
45 Transposable Elements (TE). TEs encode proteins that enable their own mobilization within the  
46 genome. Discovered by Nobel laureate Barbara McClintock in the 1940's, TEs were first  
47 described as “controlling elements” since mobilization of specific TEs (*Ac* and *Ds*) in maize  
48 caused a variegated phenotype in kernels due to an insertion into the *C* locus that is responsible  
49 for anthocyanin synthesis [1]. Despite this, TEs in eukaryotes were at first widely regarded as  
50 “junk DNA” or “selfish genes” due to their self-replicating nature, mutagenic potential and the  
51 lack of an obvious function for the host genome [2].

52 The idea of TEs as simply being genomic parasites was gradually abandoned with the  
53 ever-increasing understanding of eukaryotic genome structure. TEs are known to be found in  
54 virtually all domains of life [3]. Whereas TEs make up about 45% of the human genome [4,5],

55 the TE-derived content can be much higher in domesticated plants such as sorghum (~62%),  
56 tomato (~63%), wheat (~80%) and maize (~85%) [6, 7]. Nowadays it is well accepted that TEs  
57 are able to generate genome structural and functional variation as a result of their mobile nature  
58 and predisposition to recruit epigenetic silencing mechanisms. Through a number of processes,  
59 they can deeply affect epigenetic variation, alter or create new gene regulatory networks, as well  
60 as the formation of new proteins through the spreading of functional motifs [8, 9, 10].

61         Given the potential deleterious effects of transposition, expression and mobility of TEs  
62 are usually tightly controlled in eukaryotes. Modifications of histone tails, DNA methylation  
63 and alterations in chromatin packing and condensation are amongst the most well-known  
64 mechanisms involved in TEs silencing, but there are examples of post-transcriptional silencing  
65 of TEs by RNA interference (RNAi) (see 11 for a review). Interestingly, in vertebrates silencing  
66 can be achieved by DNA editing through APOBEC enzymes, which selectively edit the  
67 promoter region of LTR type retroelements [12, 13]. Thus, while deleterious effects of new  
68 insertions are negatively selected, advantageous changes can be incorporated (for reviews, see  
69 reference 9 and 14), playing an important role in evolution. Such is the case of maize cultivars,  
70 which are living examples of genome evolution driven by transposable elements [15].

71         Besides the classically-accepted role as drivers of genetic diversity, stress-related  
72 expression of TEs is also demonstrated to participate in different regulatory pathways, such as  
73 the human *Alu* element, which seems to regulate protein translation after exposure to stress [16].  
74 While there are many examples of stress-induced expression of TEs, recent studies also  
75 recognize TEs as important components for the maintenance of biological processes. Also, TEs  
76 have been shown to be a significant source of noncoding RNAs and to interfere in the small  
77 RNA (sRNA) machinery, which are key regulators of gene expression in plants [17, 18]. An  
78 example of such interference is the expression of the TE MIKKI during rice root development.  
79 MIKKI transcripts act as decoys for miR171, which usually targets and silences *OsSCL21*. By  
80 mimicking *OsSCL21*, MIKKI sequesters miR171 molecules, culminating in *OsSCL21*  
81 upregulation [19].

82           The Tnt1 retrotransposon is an interesting transcriptionally-active TE in somatic tissues  
83 of *Nicotiana tabacum* plants growing under normal conditions [20, 21]. Tnt1 (Genbank:  
84 X13777) is a multicopy Long Terminal Repeat (LTR) retrotransposon that was first discovered  
85 after its insertion in the nitrate reductase coding sequence [22]. It is estimated to have more than  
86 600 insertions in the tobacco genome [23] and it also has homologs in other Solanaceae under  
87 different names (*e.g.* Retrolyc1/TLC1 in tomato and Retrosol in potato) [24–26].

88           Being an LTR element, Tnt1 is composed of central open-reading frames (ORFs)  
89 flanked by 5' and 3' LTRs, which can be further divided in U3, R and U5 regions [27]. In  
90 tobacco, Tnt1 insertions are classified in three subfamilies (Tnt1A, Tnt1B and Tnt1C), which  
91 have highly conserved sequences except for their U3 regions [28]. Regulatory sequences present  
92 in each of the U3 are responsive to different hormone induction [20, 21, 29]. Interestingly, the  
93 U3 region of Tnt1A (U3A) shows sequence repeats highly similar to the GCC core, present in  
94 the promoter region of ethylene-responsive genes [30, 31]. These results suggest that expression  
95 of this subfamily could also be induced by ethylene, but they remain to be experimentally  
96 validated. Expression of Tnt1 is also known to occur in homeostatic conditions. During normal  
97 development, expression of Tnt1 was reported in roots, leaves and petals [20]. Although  
98 interesting, more data on this basal expression is lacking in the literature, and whether it has a  
99 role for tobacco development or represent a residual escape from endogenous silencing  
100 mechanisms is still an open question.

101           Given the ever-increasing number of proposed mechanisms through which TEs can  
102 exert important functions, either at genome or organism levels, Tnt1 is an interesting target for  
103 functional studies. Thus, this work aims to understand the Tnt1 pattern of expression and its  
104 potential role during plant development. Through an RNAi approach we observed phenotypic  
105 changes caused by Tnt1 downregulation, such as increased root hair production,  
106 underdevelopment of the root system and decreased seed viability. Transcriptome profiling of  
107 downregulated Tnt1 plants revealed the dynamics of Tnt1 expression and a close association  
108 with ethylene biosynthesis and responsive genes in tobacco. Taken together, these results reveal  
109 the importance of the Tnt1 retroelement for normal tobacco development.

110

## 111 **RESULTS**

### 112 **Tnt1 expression knockdown reveals a connection with ethylene biosynthesis and** 113 **responsive genes**

114         Given the presence of GCC-like motifs in the U3A region of Tnt1A insertions, we first  
115 tested if expression of Tnt1 is upregulated upon ethylene stimulus. In parallel, to understand if  
116 perturbations in the level of Tnt1 transcripts would have any detectable effect, we developed  
117 transgenic tobacco lines expressing an RNAi (hairpin, HP) construction under the Cauliflower  
118 mosaic virus 35S promoter, targeting the Tnt1 reverse transcriptase (RT) domain (Additional  
119 file: Figure S1). These lines are herein called HP(x), where (x) corresponds to an independent  
120 transformation event, followed by T(n), where (n) correspond to the generation of the transgenic  
121 line (T0 = the plant regenerated from the callus).

122         We treated two WT and two HP1 (T2) plants with ethylene, while two other individuals  
123 of each genotype did not receive the treatment (control group). After 24 hours of treatment we  
124 quantified the expression (quantitative RT-PCR) of three different Tnt1 coding domains in all  
125 individuals. Among individuals that were not exposed to ethylene treatment, HP1 plants had  
126 higher expression level of all three Tnt1 domains than the WT (Figure 1A). However, upon  
127 ethylene treatment both WT and HP1 plants overexpressed the three Tnt1 domains when  
128 compared to the control group, demonstrating that this gaseous hormone indeed induces Tnt1  
129 expression. Interestingly, while WT plants increased Tnt1 expression by a factor of 35 to 50,  
130 HP1 plants had an increase of around 20-fold. These qRT-PCR results are consistent with  
131 decrease of Tnt1 expression in HP lines treated with ethylene, confirming the knock-down of  
132 Tnt1 by the RNAi construct. Since ethylene induced Tnt1 expression and it was upregulated in  
133 untreated HP1 plants, we asked whether HP plants produced more ethylene under normal  
134 conditions. Thus, we tested ethylene emissions in 90-day-old WT, HP1 (T1), HP1 (T2) and HP8  
135 (T1) plants using gas chromatography. All HP samples showed a significant increase in  
136 ethylene production when compared to WT (Figure 1B).

137           Because ethylene biosynthesis is known to follow a circadian cycle, we also  
138 investigated the expression dynamics of *Tnt1* and some selected ethylene biosynthesis and  
139 responsive genes in WT plants throughout a period of 48 hours. For these, we used 15-day-old  
140 plants grown under a 12-hours-light / 12-hours-dark regime. Expression of two genes related to  
141 the circadian clock in *Nicotiana* species confirmed synchronization of the samples (*NtCP-23*  
142 and *NtTOC1*, reaching highest levels of expression at 12PM and 6PM respectively; Additional  
143 file 1: Figure S2A).

144           As expected, the ethylene biosynthetic genes *ACO1* and *ACO2* were transcribed in a  
145 circadian fashion in WT plants, peaking at the beginning of the light period (6h; Figure 2A).  
146 Accordingly, the ethylene responsive genes *ER24*, *JERF1* and *TEIL* also presented a circadian  
147 cycle: while *ER24* is consistently more expressed at noon, both *JERF1* and *TEIL* reached  
148 highest expression values at 6h, much like both *ACO1* and *ACO2* (Figure 2B). Expression of  
149 *Tnt1* in the WT (evaluated by the RT domain) however, showed no signs of a circadian rhythm,  
150 presenting great variation in expression between biological replicates (Figure 2C). We then  
151 checked specific expression of the U3A region (expected to be responsive to ethylene). When  
152 biological replicates are plotted separately, it becomes clear that expression of *Tnt1A* is indeed  
153 decoupled from the circadian cycle as each sample showed different levels of U3A expression  
154 (Figure 2C).

155           To further analyze the connection between *Tnt1* expression and ethylene biosynthetic  
156 and responsive genes, WT and HP plants (the same used for measurement of ethylene in gas  
157 chromatography) were also used for qRT-PCR experiments. Most genes assayed related to  
158 ethylene synthesis and response, were downregulated in HP plants when compared to the WT  
159 (Figure 3). Two copies of the ACC oxidase (*ACO1* and *ACO2*) gene, which participates in  
160 ethylene biosynthesis, were slightly downregulated (with relative expression ranging from 0.6 to  
161 0.8 when compared to WT, except for *ACO2* in HP8 with expression 1.4 times higher than the  
162 WT line (Figure 3). The ethylene responsive genes *JERF1*, *ER24*, *SAR8.2b*, *TEIL* and *CHN48*  
163 were also downregulated in HP lines, except for *TEIL* in HP8, which had expression  
164 comparable to the WT (Figure 3). Finally, we also assayed three different *Tnt1* coding domains

165 (Gag, Integrase and Reverse Transcriptase), and they were downregulated in all HP plants  
166 (Figure 3).

167

### 168 **HP lines transcriptome profile differs from wild-type tobacco**

169         Given the perturbations found in the ethylene biosynthesis and response pathways of  
170 HP lines, we asked whether these alterations could influence global gene expression. Thus, a  
171 whole transcriptome RNA-seq was performed on leaves of 45-day-old WT, empty-vector  
172 control plants (transformed with a vector with the same backbone but lacking the hairpin  
173 construction) and HP lines [HP1 (T1), HP1 (T2) and HP8 (T1)]. Because the most recent  
174 published tobacco genome is not yet complete, but is partly assembled into chromosomes by  
175 optical mapping, we expect a number of undefined nucleotides between scaffolds and is likely  
176 missing a number of gene annotations. Thus, we followed two approaches to process our RNA-  
177 seq data: (1) mapping reads against the tobacco whole genome in Solgenomics database and (2)  
178 mapping reads against unigenes from the tobacco database in Genbank.

179         Of the 35,519 annotated gene models in the tobacco genome, 16,331 had detectable  
180 expression levels [counts per million (CPM) > 1 in at least eight sequenced samples (including  
181 replicates)]. From these, we identified 932 differentially expressed genes (DEGs) in HP lines  
182 compared to the WT and control lines (FDR < 0.001, fold change  $\geq$  2). Hierarchical clustering  
183 of expression values for the 932 DEGs grouped samples in two classes, segregating HP lines  
184 from WT and control lines (Figure 4).

185         Enrichment of Gene Ontology (GO) terms (p-value  $\leq$  0.01) identified a number of  
186 modulated biological processes in the HP lines (Figure 5). The most represented terms among  
187 the upregulated genes were: organophosphate metabolic process (GO:0019637), carbohydrate  
188 catabolic process (GO:0016052) and anion transport (GO:0006820); while metabolic process  
189 (GO:0008152), cellular process (GO:0009987) and cellular metabolic process (GO:0044237)  
190 were the most frequent terms of downregulated genes. Interestingly, we observed enrichment  
191 for stress-related processes in both sets of genes [upregulated: reactive oxygen species  
192 metabolic process (GO:0072593), defense response (GO:0006952), response to ethylene

193 (GO:0009723) and reactive nitrogen species metabolic process (GO:2001057); downregulated:  
194 homeostatic process (GO:0042592), cellular homeostasis (GO:0019725) and cell redox  
195 homeostasis (GO:0045454)].

196 A second, more stringent approach was performed, in which each transgenic line  
197 (Control and HPs) were compared against WT. We then considered only DEGs consistently  
198 found in all HP samples and filtering out DEGs identified between WT and Control lines.  
199 Ninety seven DEGs were found ( $p\text{-value} \leq 0.001$ , fold change  $\geq 2$ ), reflecting significant  
200 changes in gene expression. GO categorization of these 97 DEGs corroborates the results found  
201 in the previous analysis, with terms like “defense response”, “response to biotic stimulus” and  
202 “response to ethylene” appearing in the upregulated gene set (Additional file 1: Figure S2B).  
203 We used these 97 DEGs as seeds to start the inference of the gene regulatory networks using  
204 entropy based approach from gene expression patterns. The inference process was performed by  
205 selecting the predictors for each seed gene on each step. Thirty-five networks modules were  
206 identified revealing gene circuits in HP plants that were not identified in WT. From these, the  
207 most representative network module and which had the highest number of nodes connecting 44  
208 genes is presented in Additional file 1: Figure S3.

209

### 210 **Phenotypic changes in HP lines**

211 HP plants displayed a varied range of phenotypes. Lesion mimicry was readily observed  
212 in leaves of all four HP lines selected for this study (Figure 6A). These necrotic spots were  
213 present in T1 plants growing under normal conditions, but also in subsequent generations (up to  
214 T5) when exposed to stress, such as transfer from *in vitro* cultivation to soil (Figure 6A).

215 To explore the consequences of interfering with Tnt1 expression we compared the  
216 organization of the shoot and root, as well as the germination rate of WT and HP lines (HP8 and  
217 HP13). Two measures were considered at two-leaf stage plants (15-days old): total foliar area  
218 and the maximum distance across the longer longitudinal axis of the two leaves. Under these  
219 parameters, the HP13 line showed significantly increased growth of the shoot system; the total



220 foliar area was 30% greater than the wild type and 15% longer in the longitudinal axis (Figure  
221 6B, Table 1).

222 Several morphological phenotypes were observed in roots. HP lines growing *in vitro*  
223 developed longer root hairs close to the root tip when compared to WT (Figure 7A, Additional  
224 file 1: Figure S4A). Root growth was also altered in HP lines: primary root length, surface and  
225 volume were significantly smaller in 15-days-old plants (Figure 7B; Table 2). The same result  
226 was observed when comparing the whole root system (Additional file 1: Figure S4B; Table 2).  
227 HP lines also tended to produce fewer lateral roots (Figure 7B; Additional file: Figure S4B;  
228 Table 2).

229 We also compared germination of 6-year-old and fresh seeds of WT and HP lines  
230 considering two parameters: root and cotyledon emergence. Germination was delayed in HP  
231 seeds when compared to the WT (Figure 8; Additional file 1: Figure S5). For example, at nine  
232 days after sowing most of the fresh WT seeds had both root and cotyledons emerged, with only  
233 1.33% of the seeds partially germinated with emerged roots but no cotyledon. On the other  
234 hand, in HP8 and HP13 lines 21.33% and 10.67% seedlings were partially germinated,  
235 respectively, for the same period (Figure 8). HP13 line has the most impacted germination rate  
236 (as measured 15 days after sowing), 58.92% compared to 94.66% in WT plants (Table 3). Not  
237 only the germination rate was altered, but a decrease in seed vigor was indicated by both mean  
238 germination time (MGT) and germination speed index (GSI) (Additional file 1: Figure S5;  
239 Table 3). Although HP lines had a slight reduction in germination rate compared to the WT  
240 (89.33% in HP13 versus 98.67% in WT; Additional file 1: Figure S5; Table 3), only the MGT  
241 was significantly different in HP lines (Additional file 1: Figure S5; Table 3).

242

### 243 **Tnt1 genomic insertions**

244 We asked how interfering with Tnt1 expression could result in the phenotypes and  
245 transcriptome profile changes observed in HP lines. The presence of Tnt1 insertions in the  
246 vicinity of genes and / or within introns could lead to an indirect reduction in mRNA of those  
247 genes in HP lines via the RNAi mechanism. To avoid this bias, we first identified genomic

248 copies of Tnt1 by searching and annotating its distinct domains (i.e. U3A, U3B, U3C, U5, the  
249 whole LTR, as well as the coding domains GAG, PROT, INT, RT and RNH) .

250 A total of 276 U3A, 155 U3B and 35 U3C regions were found, each of them being part  
251 of a complete Tnt1 insertion, an incomplete insertion or even a solo LTR. Not surprisingly,  
252 many Tnt1 insertions are found in close proximity to scaffold borders, making it impossible to  
253 determine the completeness of most of the insertions. Next we identified the first gene present  
254 within a 5kb distance (in both upstream and downstream direction) of each U3 region. From the  
255 216 genes found near Tnt1 insertions, only 11 were differentially expressed, being 8  
256 upregulated and 3 downregulated. Interestingly, 127 of these 216 genes had no detectable  
257 expression levels in our RNA-seq experiment, suggesting that Tnt1 insertions may play a role in  
258 silencing mechanisms of neighbor genes.

259 Finally, given that there is not yet a complete assembly of the tobacco genome, it is  
260 important to note that these results are possibly an underrepresentation of the total number of  
261 genomic Tnt1 insertions. As described above, because of their repetitive nature, Tnt1 sequences  
262 are prone to appear next to scaffold borders, and a number of unknown insertions are expected  
263 to exist in the gaps between scaffolds.

#### 264 **Tnt1 LTR as a putative source of sRNAs harboring GCC-motifs**

265 Because TEs are known to be a source of noncoding RNAs, we checked if Tnt1  
266 transcripts could form secondary structures. Thus, we performed a folding prediction of part of  
267 the Tnt1A mRNA, which includes three 3' U3 GCC-like motifs (Figure 9). The prediction  
268 reveals stem-loop secondary structures, and GCC-like motifs would be located in the arms of  
269 the putative hairpin loops (Figure 9), with the folded RNA free energy of  $dG = -24$  kcal/mol.

270 Next, we used PsRNATarget (see “Methods” section for details) to search for potential  
271 targets of three putative sRNAs derived from the stem-loop secondary structures predicted in  
272 the previous step, each of them containing one GCC-like motif. To account for both  
273 transcriptional and post-transcriptional possible targets of sRNAs, searches were performed in  
274 two datasets: (1) a PsRNATarget built-in library of 25,398 *Nicotiana tabacum* SGN unigenes, in

275 which only the coding sequences are considered, and; (2) sequences of 3kb upstream of the 932  
276 DEGs identified in this work, aiming to understand if the promoter region of such genes could  
277 be potential targets of the sRNAs. Because GCC motifs are regulatory sequences, one would  
278 expect them to be found in the promoter region of genes, particularly among the DEGs found in  
279 the present study.

280 As results, we found 224 putative targets within the coding sequences of the SGN unigenes  
281 library, from which 14 were present in our set of 932 DEGs. When targeting the upstream 3kb  
282 region, a total of 106 out of the 932 DEGs showed potential targets for the putative sRNAs, of  
283 which 67 were upregulated and 39 downregulated in HP lines. Based on these results, our  
284 hypothesis is that Tnt1 exerts transcriptional regulation of some genes via sRNAs.

285

## 286 **DISCUSSION**

### 287 **The dynamics of Tnt1 expression in WT tobacco**

288 Expression of the Tnt1 retroelement is known to be induced by both biotic and abiotic  
289 factors. Protoplast preparation by fungal extracts is the most studied way to induce Tnt1  
290 expression, and was used to demonstrate mobilization of the element [32]. Likewise, expression  
291 of Tnt1 was reported to be induced upon viral infection and seems to be linked to plant defense  
292 responses, although its role in such cases is still unclear [33]. Interestingly, expression of Tnt1  
293 subfamilies (Tnt1A, Tnt1B and Tnt1C) is induced by different stress-associated molecules, with  
294 Tnt1A being particularly upregulated by cryptogein and methyl jasmonate [29]. Activation of  
295 different subfamilies is accredited to the presence of specific promoter motifs in each of their  
296 U3 regions (U3A, U3B and U3C). Although Tnt1A responsiveness to ethylene has been  
297 previously hypothesized due the presence of repetitive GCC-like motifs in its U3A region [31],  
298 no experimental data was available to support this idea. Our results demonstrate that after  
299 exposure to the gaseous-hormone ethylene, expression of Tnt1 is upregulated (30 to 40-fold  
300 increase).

301 Expression of ethylene biosynthetic and responsive genes follow a basal circadian  
302 cycle, however that does not mean senescence, stress-responses, and other mechanisms dictated  
303 by ethylene also oscillates in a circadian fashion. Results from an experiment designed to  
304 address if Tnt1 followed either of the two ethylene expression patterns (circadian associated or  
305 not) is consistent with the non-circadian response and support basal and continuous Tnt1  
306 expression. The hypothesis raised by the results presented is that Tnt1 basal expression is not  
307 controlled by ethylene, but rather induced by the hormone only under specific conditions,  
308 probably requiring additional signaling or an elevated ethylene concentration.

309 Likewise, expression of Tnt1A, as indicated by quantification of both the RT domain  
310 and the specific U3A region, oscillate in a non-circadian fashion and greatly differs between  
311 biological replicates growing under the same controlled conditions. These results suggest that,  
312 under normal conditions, Tnt1A expression is not dictated by ethylene but rather by unknown,  
313 possibly stochastic, factors. In this scenario, ethylene induction of Tnt1A expression seems to  
314 be subject of additional regulation and may require exposure to a minimum threshold of the  
315 hormone.

316

### 317 **Perturbations in Tnt1 expression lead to phenotypic and transcriptomic changes.**

318 Since Tnt1 has basal expression in different tissues [20], we sought to understand  
319 whether its suppression would culminate in detectable phenotypes. Thus, we generated  
320 transgenic RNAi lines (herein referred as HP lines) expressing a hairpin targeting the RT  
321 domain of Tnt1. With this approach, Tnt1 transcripts were consistently downregulated upon  
322 ethylene treatment.

323 Different HP lines displayed recurring phenotypes, namely lesion mimicry in leaves,  
324 underdevelopment of the root system, overproduction of root hairs and early loss of seed  
325 viability. Most of these developmental aspects are regulated by ethylene to some extent. For  
326 instance, root hair production is induced by ethylene in *Arabidopsis* [34–36]. Interestingly,  
327 mutation in the *Arabidopsis RHD6* gene, which mediates ethylene-response during root hair

328 formation, leads not only to a decrease in root hair production but also to a shift in their  
329 initiation site towards the root base [35], which is the opposite effect observed in HP lines.

330 In addition, the germination process is mediated by counteracting effects of ethylene  
331 and ABA in numerous species, including tobacco (see 37 for a review). It is possible that HP  
332 seeds lose viability via early partial release of dormancy by an overproduction of ethylene.  
333 Accordingly, we demonstrated that HP plants overproduce ethylene when compared to the WT.

334 Functional categorization of the 932 DEGs in HP lines reveals enrichment of stress-  
335 related processes among upregulated genes, while metabolic and homeostatic processes in the  
336 downregulated set of genes. This pattern is supported in a second and more strict analysis that  
337 pointed to 97 modulated genes. Among these DEG, several genes related to ethylene  
338 biosynthesis and plant defense response were upregulated in all HP lines but not in the WT as  
339 follows: two ACC oxidase/ethylene forming enzymes (EFs), involved in the last step of  
340 ethylene synthesis (accession numbers AB012857 and Z29529)[38]; five pathogenesis-related  
341 protein (PR) family members (EH620111, EH621793, X03913, M29868 and X51426)[39–41];  
342 phospholipase D which participates in signal transduction cascades in stress responses [42]; and  
343 an ethylene responsive gene induced during the pathogen-induced systemic acquired resistance,  
344 Sar8.2b (EH621848) [43]. In addition, we identified the repression of several chlorophyll a/b  
345 binding proteins in HP leaves. Senescence is marked by a decline of the photosynthetic  
346 apparatus and mobilization of nutrients from senescing leaves to growing tissues, culminating in  
347 cell death [44]. Likewise, hydroxy-methylglutaryl-coenzyme A reductase (HMGR)-like genes  
348 were up-regulated in HP plants. This enzyme participates in the steroid derivatives synthesis  
349 that follows pathogen infections [45]. This possibly corresponds to the spread of the initial  
350 stress signal throughout the plant. Although at this point it is not possible to distinguish between  
351 primary and secondary effects, we propose that the retrotransposon not only responds to some  
352 biotic and abiotic stresses, but also fine-tunes their occurrence and progression. Likewise, our  
353 network analysis strengthened the emergence of a new pattern of expression and gene regulation

354 in the HP plants, and uncovered similar biological processes (e.g. defense and stress response)  
355 as the main changes in HP lines.

356

### 357 **Tnt1 acting as modulator of plant development and response to stress**

358 Curiously, the expression kinetics differ between samples used for the RNA-seq  
359 experiment and those assayed by RT-qPCR, i.e. while ethylene-related genes were upregulated  
360 in the former, most of these genes were downregulated in HP lines used for qRT-PCR. Because  
361 samples used for qPCR were sealed in a container prior to harvesting, they were exposed to an  
362 increased concentration of the hormone. Accordingly, these samples showed downregulation of  
363 Tnt1 expression (GAG, INT and RT domains) in comparison to WT plants, much like the  
364 results obtained after application of exogenous ethylene (compare Figures 1A and 3). Thus,  
365 differently from WT, HP plants growing under normal conditions overproduce ethylene and  
366 behave as if constantly responding to stress, while showing a decreased response to stress when  
367 exposed to higher concentrations of ethylene. These results are consistent with Tnt1 modulation  
368 of two distinct processes: (1) maintaining homeostasis during normal development and (2) fine-  
369 tuning stress responses possibly mediated by ethylene.

370 Finally, we combine our results to propose a model of the interaction between  
371 expression of Tnt1, ethylene biosynthesis genes and ethylene responsive genes that contain  
372 GCC motifs in their promoter (Figure 10). In this model, we consider two different conditions: a  
373 period of time when a WT plant exists under ideal conditions for normal growth and another  
374 under a stress pressure. Under normal growth conditions, WT tobacco plants express Tnt1 in a  
375 basal level, which fluctuates within a range of up to 8-fold, as observed in our circadian  
376 experiment. Genes involved in ethylene biosynthesis and other ethylene responsive genes that  
377 have GCC motifs in their promoters are also expressed in a circadian fashion (since ethylene is  
378 required in various moments of plant development and not only during plant defense responses).  
379 Upon a stress stimulus, ethylene biosynthesis is increased and this is one of the events that  
380 define the commencement of the defense responses. The overproduction of ethylene triggers the

381 upregulation of genes that contain GCC motifs in their promoter (such as Tnt1 and other  
382 responsive genes). According to our analysis, it is possible that Tnt1A mRNA can be a source  
383 of sRNAs that target GCC motifs in the promoter region of genes, or alternatively, in the 3'UTR  
384 of mRNAs. Thus, as Tnt1 is upregulated by ethylene, there is a turning point in which the  
385 Tnt1A sRNA production and consequent transcriptional inhibition of Tnt1 and target genes  
386 overcomes the ethylene induction, thus lowering the amount of mRNA of Tnt1 and of ethylene  
387 responsive genes. After ethylene responsive genes reach their maximum of expression, right  
388 before Tnt1A mRNA-derived sRNAs start to inhibit their transcription, it is likely that the  
389 defense responses have taken place and were sufficient to overcome the initial stress, thus  
390 removing this stimulus and lowering the expression of ethylene biosynthetic genes through  
391 ethylene auto-inhibition. The decrease in ethylene production removes the induction signal for  
392 Tnt1 transcription, lowering Tnt1 transcription and thus lowering Tnt1A sRNA production also.  
393 This way the system is pushed back to its “normality” after the stress has been overcome.

394

## 395 **CONCLUSIONS**

396 Although transcriptionally active TEs are commonly taken as a potential threat to their  
397 host organisms, there are recent reports of other TEs playing important roles for plant  
398 development. Such is the case of the MIKKI retrotransposon modulating root development in  
399 rice [19]. Another interesting case is found in *Solanum* species, in which the MESSI  
400 retrotransposon family is expressed specifically in the shoot apical meristem, suggesting that  
401 these TEs can respond to developmental signals [46]. Our findings suggest that active  
402 retrotransposons, not only domesticated transposable elements, can play a significant functional  
403 role in their host organisms. We hypothesize that Tnt1 can exert transcriptional control over  
404 itself as well as other endogenous genes. In our model we propose a potential new biological  
405 role for Tnt1. Upon stress induction, Tnt1 would provide feedback control to ethylene-mediated  
406 gene regulation in tobacco defense responses, bringing the system back to a homeostatic  
407 condition after the initial stress stimulus has been overcome. Further studies on the progression

408 of Tnt1 expression during stress response and recovery, as well as small RNA-seq experiments,  
409 can validate and bring new insights to the model presented herein.

410

## 411 **METHODS**

### 412 **Plant samples and genetic transformation**

413 Plants of *Nicotiana tabacum* cv Xanthi XHFD8 were used for genetic transformation to  
414 produce transgenic RNAi lines, herein referred as “HP lines”. We design a hairpin construct  
415 aiming to target a conserved region of the Tnt1 RT domain, shared by the Tnt1A, Tnt1B and  
416 Tnt1C subfamilies. To achieve the hairpin construction, a 273bp fragment of the Tnt1  
417 (accession number X13777.1) reverse transcriptase was amplified from *N. tabacum* genomic  
418 DNA (forward primer 5’ CGGGATCCATCTCAGCAGAAGTACAT 3’, reverse primer 5’  
419 CCATCGATACTTCCCAATGTTCC 3’). This fragment was cloned in the expression vector  
420 pHANNIBAL (accession number AJ311872.1) in both sense and antisense directions, separated  
421 by an intron, in order to express a Tnt1 hairpin. Expression cassettes were excised from  
422 pHANNIBAL and transferred to the binary vector pCAMBIA1201, generating pCAMBIA-  
423 Tnt1-RT. Control plants were transformed only with the pCAMBIA1201 backbone containing  
424 the hygromycin resistance gene. *Nicotiana tabacum* foliar discs were transformed with  
425 pCAMBIA-Tnt1-RT through *Agrobacterium tumefaciens* (LBA4404) co-culture, according to a  
426 previously established method [47]. Seventeen transgenic HP plants were generated with this  
427 cassette. Regenerated *in vitro* transgenic plants were cultivated in MS20 media with the proper  
428 antibiotic, under a 14-hour photoperiod at 24°C.

429

### 430 **Phenotyping of transgenic lines**

431 For all phenotyping experiments, seeds of WT and HP lines were first primed (24 hours  
432 in sterile distilled water at 10°C) and then germinated and grown *in vitro* in MS20 medium [48]  
433 under a 14-hour photoperiod at 24°C. Comparison of leaf area and leaf length was done using  
434 pictures taken from 15-day-old seedlings and then used for measurements with Fiji distribution  
435 of ImageJ [49]. For root analyzes, plants were grown in 45° inclined Petri dishes. Pictures were



436 taken from plants 15 days after sowing. These pictures were used for measurements with the  
437 ImageJ SmartRoot plugin [50]. Germination assay was performed through daily observation of  
438 root and cotyledon emergence. Germination Speed Index (GSI) and Mean Germination Time  
439 (MGT) were calculated following [51]. All experiments were done using three replicates of 25  
440 plants per line.

441

#### 442 **RNA-seq and reads processing**

443 Total RNA from leaves of 45-day-old plants were frozen in liquid nitrogen. Four  
444 biological replicates from three independent HP lines, one Control and one WT were harvested.  
445 TRI Reagent® (Sigma-Aldrich) was used for RNA isolation according to the manufacturer's  
446 instructions. Samples were treated with DNaseI (Ambion) and ribosomal RNA was depleted  
447 using Ribominus Plant Kit (Invitrogen) following the manufacturer's instructions. The cDNA  
448 libraries were made using SOLID Total RNA-seq Kit (Ambion), according to Whole  
449 Transcriptome Library Preparation for SOLID Sequencing Protocol (Life Technologies). The  
450 handling of the beads for sequencing was done strictly according to the SOLID 3 System  
451 Templated Bead Preparation Guide (Life Technologies). The run of the samples followed the  
452 SOLID 3 System Instrument Operation Guide (Life Technologies). The RNA-seq produced a  
453 total of 602,744,341 single-end reads (GenBank GEO accession GSE44027), which were  
454 trimmed and quality filtered using Trimmomatic [52] with default settings.

455

#### 456 **Bioinformatics and gene expression analysis of RNA-seq data**

457 The RNA-seq reads were first mapped against the tobacco genomic assemble [53] using  
458 HISAT2 [54] set to default parameters. Differentially expressed genes (DEGs) were defined  
459 using edgeR [55]. Lowly expressed genes were filtered out based on a minimum of 10 counts  
460 per million in at least eight sequenced samples (including replicates). Sample normalization was  
461 performed using the trimmed mean of M-values (TMM) method. Threshold for DEGs was set  
462 using a false discovery rate (FDR) of  $< 0.001$ , yielding 932 genes. In a more stringent approach,  
463 reads were also mapped against 24,069 unigenes from the tobacco database in Genbank. The

464 normalization of transcriptome data was done based on RPKM expression measure [56], square  
465 root, and Bonferroni's correction. Using statistical t-test with p-value < 0.001 we generated two  
466 subsets of modulated genes, the first comparing the three HP in contrast to WT lines, and only  
467 the modulated in the three HP were considered. The second subset comprises the genes  
468 modulated comparing HPs with Control, in order to filter out genes possibly modulated due to  
469 the transgenesis process. This method identified 97 DEGs. Gene ontology (GO) analysis was  
470 performed using Blast2GO [57]. Enrichment tests among upregulated and downregulated genes  
471 were made comparing the set of expressed genes in all samples with those expressed in HP lines  
472 with p-value  $\leq 0.01$ .

473

#### 474 **Gene regulatory networks**

475 Connections between genes were inferred by adopting the mean conditional entropy  
476 (MCE) from the observed gene expression data [58]. The MCE is an information measure that  
477 for each target gene indicates the contribution of its predictors to correctly detect the target  
478 behavior in a multivariate way.

#### 479 **Annotation of Tnt1 genomic insertions**

480 Sequences for each domain of Tnt1A (X13777), as well as known variant sequences of  
481 U3A (AJ227998, AJ228000, AJ228002 – AJ228006, AJ228008, AJ228010 – AJ228012,  
482 AJ228014 – AJ228017), U3B (AJ227999, AJ228007, AJ228009, AJ228013) and U3C  
483 (AJ228001) were imported into Geneious Prime 2020.0.5 software (<https://www.geneious.com>).  
484 Next the “Live Predict & Annotate” tool (which performs a blast-like search) were used with a  
485 threshold of 60% to find and annotate each Tnt1 domain in the tobacco genome [53]. The first  
486 gene present within a 5kb distance (both upstream and downstream) of each insertion was  
487 retrieved, as well as information about its orientation in relation to the insertion (sense or  
488 antisense).

#### 489 **Small RNAs target prediction**

490 Prediction of sRNAs putative targets were performed using the PsRNATarget tool [59]  
491 with default parameters. For target sites within coding sequences, the build-in *Nicotiana*

492 *tabacum* SGN unigene cDNA library was used. Promoter region of the differentially expressed  
493 genes were extracted from the tobacco genome latest release [53], considering 3kb upstream of  
494 each gene.

495

#### 496 **Ethylene treatment and ethylene gas chromatography**

497 Tnt1 induction by ethylene was performed by placing plants in sealed containers and  
498 then ethylene was taken from a concentrated stock (Alltech, Deerfield, IL) and injected into the  
499 containers using a syringe to a final concentration of 10  $\mu$ L/mL. This concentration was  
500 monitored by gas chromatography every 6 h and remained stable throughout the treatment.  
501 Control plants were incubated in sealed containers without ethylene injection. The containers  
502 were opened after 24 hours, leaf samples (300 mg) were collected and processed for total RNA  
503 isolation. We also measured ethylene emission in 90-day-old HP and WT plants by gas  
504 chromatography.

505

#### 506 **Gene expression analyzes through quantitative Real Time PCR (qRT-PCR)**

507 For the circadian experiment, plants were grown in a 12 hours light / 12 hours dark  
508 regime in MS20 medium at 24°C. Samples were harvested each six hours for 48 hours as  
509 follow: 12 PM – midpoint of the light period; 6 PM – start of the dark period; 12 AM –  
510 midpoint of the dark period; 6 AM – start of the light period. Each sample comprised a pool of  
511 four whole seedlings. All the other qRT-PCR experiments were done using plants grown under  
512 a 14-hour photoperiod at 24°C.

513 RNA was extracted from samples using a modified LiCl method [60] and treated with  
514 DNaseI (Ambion). cDNA was synthesized using SuperScript First-Strand Synthesis System for  
515 RT-PCR (Life Technologies) following the manufacturer's instructions. The real time RT-PCR  
516 reactions were performed using the SYBR Green Real-Time PCR Master Mix according to  
517 manufacturer's instructions. All experiments were based on three biological replicates with  
518 three technical replicates each.

519

520 **LIST OF ABBREVIATIONS**

521 cDNA: complementary DNA; CPM: Counts per million; DEGs: Differential expression genes;  
522 EFEs: Ethylene forming enzymes; FDR: False discovery rates; Gag: Group antigens; GO: Gene  
523 ontology; GSI: germination seed index; HP: Hair-pin lines; INT: Integrase; LTR: Long terminal  
524 repeats; MCE: Mean conditional entropy; MGT: Mean germination time; miRNA: micro RNA;  
525 mRNA: messenger RNA; ORFs: Open reading frames; PR: pathogenesis-related; qPCR:  
526 Quantitative polymerase chain reaction; RNAi: RNA interference; RPKM: Reads per kilo base  
527 per million mapped reads; RT: Reverse transcriptase; SGN: Sol genomics network; sRNA:  
528 small RNA; TE: Transposable Elements; TMM: Trimmed means of M values; WT: Wild type.

529

530 **DECLARATIONS**

531 **Ethics approval and consent of participate**

532 Not applicable

533 **Consent for publication**

534 Not applicable

535 **Availability of data and materials**

536 Raw sequences generated in this study are deposited in GenBank  
537 (<https://www.ncbi.nlm.nih.gov/genbank/>) as GEO accession number GSE44027.

538 **Competing interests**

539 The authors declare that they have no competing interests.

540 **Funding**

541 This study was supported by the following grants: FAPESP 08/55646-4  
542 and CNPq 4813322/2009-4, 308197/2010-0 (M.A.V.S.), PNPd/CAPES 1633/04-0 (J.H.L.),  
543 FAPESP 2009/50630-5 and PNPd/CAPES 0280/09-0 (E.M.J.), DS CAPES  
544 (D.M.Q.), FAPESP □2004/04088-0 (B.K.).

545 **Author's contributions**

546 Conceptualization MAVS, DQ and JHL; Data curation DQ, EMJ and JHL; Formal  
547 analysis DQ, EMJ, JHL, FL, JPK, MAVS; Funding acquisition MAVS; Methodology AAC,  
548 RBP, FL, DQ, EMJ, JHL, HMD, BK; Supervision MAVS; Roles/Writing - original draft DQ,  
549 JHL, EMJ; Writing - review & editing AAC, TBJ, JHL, MAVS.

#### 550 **Acknowledgements**

551 We thank Dr. Tatiana Corrêa for assistance with experiments, Dr. Myna Nakabashi for  
552 technical support with plant transformation, Dr. Anna Christina de Mattos Salim for technical  
553 assistance with transcriptome sequencing and Dr. Luciano Freschi, Dr. Hana Masuda, Dr.  
554 Nathália de Setta, Dr. Walter Colli, Dr. Françoise Simon-Plaz and Dr. Marie-Angele  
555 Grandbastien for discussions and comments on the manuscript.

556

#### 557 **REFERENCES**

- 558 1. Fedoroff N V. Transposable genetic elements in maize. *Scientific American*. 1984;250:84–  
559 98.
- 560 2. Orgel LE, Crick FHC. Selfish DNA: The ultimate parasite. *Nature*. 1980;284:604–7.
- 561 3. Pritham EJ. Transposable Elements and Factors Influencing their Success in Eukaryotes.  
562 *Journal of Heredity* [Internet]. 2009;100:648–55. Available from:  
563 <https://academic.oup.com/jhered/article-lookup/doi/10.1093/jhered/esp065>
- 564 4. Frazier M, Gibbs RA, Muzny DM, Scherer SE, Bouck JB, Sodergren EJ, et al. Initial  
565 sequencing and analysis of the human genome. *Nature* [Internet]. 2001;409:860–921. Available  
566 from:  
567 [http://www.ncbi.nlm.nih.gov/pubmed/11237011?ordinalpos=4&itool=EntrezSystem2.PEntrez.P](http://www.ncbi.nlm.nih.gov/pubmed/11237011?ordinalpos=4&itool=EntrezSystem2.PEntrez.Pubmed.Pubmed_ResultsPanel.Pubmed_RVDocSum)  
568 [ubmed.Pubmed\\_ResultsPanel.Pubmed\\_RVDocSum](http://www.ncbi.nlm.nih.gov/pubmed/11237011?ordinalpos=4&itool=EntrezSystem2.PEntrez.Pubmed.Pubmed_ResultsPanel.Pubmed_RVDocSum)
- 569 5. de Koning APJ, Gu W, Castoe TA, Batzer MA, Pollock DD. Repetitive elements may  
570 comprise over Two-Thirds of the human genome. *PLoS Genetics*. 2011;7.
- 571 6. Negi P, Rai AN, Suprasanna P. Moving through the Stressed Genome: Emerging Regulatory  
572 Roles for Transposons in Plant Stress Response. *Frontiers in Plant Science* [Internet].  
573 2016;7:1448. Available from: <http://journal.frontiersin.org/article/10.3389/fpls.2016.01448/full>

- 574 7. Hirsch CD, Springer NM. Transposable element influences on gene expression in plants.  
575 *Biochimica et Biophysica Acta (BBA) - Gene Regulatory Mechanisms* [Internet]. Elsevier B.V.;  
576 2017;1860:157–65. Available from: <http://dx.doi.org/10.1016/j.bbagr.2016.05.010>
- 577 8. Feschotte C. The contribution of transposable elements to the evolution of regulatory  
578 networks. *Nature Reviews Genetics*. 2008;9:397–405.
- 579 9. Souza FSJ de, Franchini LF, Rubinstein M. Exaptation of transposable elements into novel  
580 cis-regulatory elements: Is the evidence always strong? *Molecular Biology and Evolution*.  
581 2013;30:1239–51.
- 582 10. Stuart T, Eichten SR, Cahn J, Karpievitch Y V., Borevitz JO, Lister R. Population scale  
583 mapping of transposable element diversity reveals links to gene regulation and epigenomic  
584 variation. *eLife*. 2016;5:1–27.
- 585 11. Slotkin RK, Martienssen R. Transposable elements and the epigenetic regulation of the  
586 genome. *Nature reviews Genetics* [Internet]. 2007;8:272–85. Available from:  
587 <http://www.ncbi.nlm.nih.gov/pubmed/17363976>
- 588 12. Anwar F, Davenport MP, Ebrahimi D. Footprint of APOBEC3 on the genome of human  
589 retroelements. *Journal of virology* [Internet]. 2013;87:8195–204. Available from:  
590 [http://www.pubmedcentral.nih.gov/articlerender.fcgi?artid=3700199&tool=pmcentrez&rendert](http://www.pubmedcentral.nih.gov/articlerender.fcgi?artid=3700199&tool=pmcentrez&rendertype=abstract)  
591 [ype=abstract](http://www.pubmedcentral.nih.gov/articlerender.fcgi?artid=3700199&tool=pmcentrez&rendertype=abstract)
- 592 13. Knisbacher BA, Levanon EY. DNA editing of LTR retrotransposons reveals the impact of  
593 APOBECs on vertebrate genomes. *Molecular Biology and Evolution*. 2016;33:554–67.
- 594 14. Chuong EB, Elde NC, Feschotte C. Regulatory activities of transposable elements: From  
595 conflicts to benefits. *Nature Reviews Genetics* [Internet]. Nature Publishing Group;  
596 2017;18:71–86. Available from: <http://dx.doi.org/10.1038/nrg.2016.139>
- 597 15. Fedoroff N V. Transposable Elements, Epigenetics, and Genome Evolution. *Science*  
598 [Internet]. 2012;338:758–67. Available from:  
599 <http://www.sciencemag.org/cgi/doi/10.1126/science.338.6108.758>
- 600 16. Häslér J, Strub K. Alu RNP and Alu RNA regulate translation initiation in vitro. *Nucleic*  
601 *Acids Research*. 2006;34:2374–85.

- 602 17. Li Y, Li C, Xia J, Jin Y. Domestication of transposable elements into MicroRNA genes in  
603 plants. Schönbach C, editor. PloS one [Internet]. 2011;6:e19212. Available from:  
604 <https://dx.plos.org/10.1371/journal.pone.0019212>
- 605 18. Wang D, Qu Z, Yang L, Zhang Q, Liu ZH, Do T, et al. Transposable elements (TEs)  
606 contribute to stress-related long intergenic noncoding RNAs in plants. *Plant Journal*.  
607 2017;90:133–46.
- 608 19. Cho J, Paszkowski J. Regulation of rice root development by a retrotransposon acting as a  
609 microRNA sponge. *eLife*. 2017;6:1–21.
- 610 20. Pouteau S, Huttner E, Grandbastien M a., M.Caboche M. Specific expression of the tobacco  
611 Tnt1 in protoplasts. *EMBO Journal*. 1991;10:1911–8.
- 612 21. Casacuberta JM, Vernhettes S, Grandbastien M a. Sequence variability within the tobacco  
613 retrotransposon Tnt1 population. *The EMBO journal* [Internet]. 1995;14:2670–8. Available  
614 from:  
615 <http://www.pubmedcentral.nih.gov/articlerender.fcgi?artid=398381&tool=pmcentrez&renderty>  
616 [pe=abstract](http://www.pubmedcentral.nih.gov/articlerender.fcgi?artid=398381&tool=pmcentrez&renderty)
- 617 22. Grandbastien M-A, Spielmann A, Caboche M. Tnt1, a mobile retroviral-like transposable  
618 element of tobacco isolated by plant cell genetics. *Nature* [Internet]. 1989;337:376–80.  
619 Available from: <http://www.nature.com/articles/337376a0>
- 620 23. Melayah D, Lim KY, Bonnivard E, Chalhoub B, Dorlhac De Borne F, Mhiri C, et al.  
621 Distribution of the Tnt1 retrotransposon family in the amphidiploid tobacco (*Nicotiana*  
622 *tabacum*) and its wild *Nicotiana* relatives. *Biological Journal of the Linnean Society*.  
623 2004;82:639–49.
- 624 24. Araujo PG, Casacuberta JM, Costa APP, Hashimoto RY, Grandbastien MA, Van Sluys MA.  
625 Retrolyc1 subfamilies defined by different U3 LTR regulatory regions in the *Lycopersicon*  
626 genus. *Molecular Genetics and Genomics*. 2001;266:35–41.
- 627 25. Manetti ME, Rossi M, Costa APP, Clausen AM, Van Sluys M-A. Radiation of the Tnt1  
628 retrotransposon superfamily in three Solanaceae genera. *BMC evolutionary biology*. 2007;7:34.
- 629 26. Tapia G, Verdugo I, Yañez M, Ahumada I, Theoduloz C, Cordero C, et al. Involvement of

- 630 Ethylene in Stress-Induced Expression of the TLC1.1 Retrotransposon from *Lycopersicon*  
631 *chilense* Dun. *Plant Physiology* [Internet]. 2005;138:2075–86. Available from:  
632 <http://www.plantphysiol.org/lookup/doi/10.1104/pp.105.059766>
- 633 27. Casacuberta JM, Grandbastien M angèle. Characterisation of LTR sequences involved in the  
634 protoplast specific expression of the tobacco Tnt1 retrotransposon. *Nucleic Acids Research*.  
635 1993;21:2087–93.
- 636 28. Vernhettes S, Grandbastien M a, Casacuberta JM. The evolutionary analysis of the Tnt1  
637 retrotransposon in *Nicotiana* species reveals the high variability of its regulatory sequences.  
638 *Molecular biology and evolution*. 1998;15:827–36.
- 639 29. Beguiristain T, Grandbastien M-A, Puigdomènech P, Casacuberta JM. Three Tnt1  
640 Subfamilies Show Different Stress-Associated Patterns of Expression in Tobacco.  
641 Consequences for Retrotransposon Control and Evolution in Plants. *Plant Physiology* [Internet].  
642 2001;127:212–21. Available from: <http://www.plantphysiol.org/cgi/doi/10.1104/pp.127.1.212>
- 643 30. Shinshi H, Usami S, Ohme-Takagi M. Identification of an ethylene-responsive region in the  
644 promoter of a tobacco class I chitinase gene. *Plant Molecular Biology*. 1995;27:923–32.
- 645 31. Grandbastien M-A, Audeon C, Bonnivard E, Casacuberta JM, Chalhoub B, Costa A-PP, et  
646 al. Stress activation and genomic impact of Tnt1 retrotransposons in Solanaceae. *Cytogenetic*  
647 *and Genome Research* [Internet]. 2005;110:229–41. Available from:  
648 <https://www.karger.com/Article/FullText/84957>
- 649 32. Melayah D, Bonnivard E, Chalhoub B, Audeon C, Grandbastien MA. The mobility of the  
650 tobacco Tnt1 retrotransposon correlates with its transcriptional activation by fungal factors.  
651 *Plant Journal*. 2001;28:159–68.
- 652 33. Grandbastien M a, Lucas H, Morel JB, Mhiri C, Vernhettes S, Casacuberta JM. The  
653 expression of the tobacco Tnt1 retrotransposon is linked to plant defense responses. *Genetica*  
654 [Internet]. 1997;100:241–52. Available from: <http://www.ncbi.nlm.nih.gov/pubmed/9440277>
- 655 34. Song L, Yu H, Dong J, Che X, Jiao Y, Liu D. The Molecular Mechanism of Ethylene-  
656 Mediated Root Hair Development Induced by Phosphate Starvation. *PLoS Genetics* [Internet].  
657 2016;12:1–29. Available from: <http://dx.doi.org/10.1371/journal.pgen.1006194>



- 658 35. Masucci JD, Schiefelbein JW. The *rh6* Mutation of *Arabidopsis thaliana* Alters Root-Hair  
659 Initiation through an Auxin- and Ethylene-Associated Process. *Plant Physiology* [Internet].  
660 1994;106:1335–46. Available from:  
661 <http://www.plantphysiol.org/lookup/doi/10.1104/pp.106.4.1335>
- 662 36. Feng Y, Xu P, Li B, Li P, Wen X, An F, et al. Ethylene promotes root hair growth through  
663 coordinated EIN3/EIL1 and RHD6/RSL1 activity in *Arabidopsis*. *Proceedings of the National*  
664 *Academy of Sciences*. 2017;114:13834–9.
- 665 37. Corbineau F, Xia Q, Bailly C, El-Maarouf-Bouteau H. Ethylene, a key factor in the  
666 regulation of seed dormancy. *Frontiers in Plant Science*. 2014;5:1–13.
- 667 38. Hamilton AJ, Bouzayen M, Grierson D. Identification of a tomato gene for the ethylene-  
668 forming enzyme by expression in yeast. *Proceedings of the National Academy of Sciences*  
669 [Internet]. 1991;88:7434–7. Available from:  
670 <http://www.pnas.org/cgi/doi/10.1073/pnas.88.16.7434>
- 671 39. Cornelissen BJC, Horowitz J, van Kan JA I, Goldberg RB, Bol JF. Structure of tobacco  
672 genes encoding pathogenesis-related proteins from the PR-1 group. *Nucleic Acids Research*  
673 [Internet]. 1987;15:6799–811. Available from: [https://academic.oup.com/nar/article-](https://academic.oup.com/nar/article-lookup/doi/10.1093/nar/15.17.6799)  
674 [lookup/doi/10.1093/nar/15.17.6799](https://academic.oup.com/nar/article-lookup/doi/10.1093/nar/15.17.6799)
- 675 40. Linthorst HJM. Analysis of Acidic and Basic Chitinases from Tobacco and *Petunia* and  
676 Their Constitutive Expression in Transgenic Tobacco. *Molecular Plant-Microbe Interactions*  
677 [Internet]. 1990;3:252. Available from:  
678 [http://www.apsnet.org/publications/mpmi/backissues/Documents/1990Abstracts/Microbe03-](http://www.apsnet.org/publications/mpmi/backissues/Documents/1990Abstracts/Microbe03-252.htm)  
679 [252.htm](http://www.apsnet.org/publications/mpmi/backissues/Documents/1990Abstracts/Microbe03-252.htm)
- 680 41. van Loon LC, Rep M, Pieterse CMJ. Significance of Inducible Defense-related Proteins in  
681 Infected Plants. *Annual Review of Phytopathology* [Internet]. 2006;44:135–62. Available from:  
682 <http://www.annualreviews.org/doi/10.1146/annurev.phyto.44.070505.143425>
- 683 42. Bargmann BOR, Munnik T. The role of phospholipase D in plant stress responses. *Current*  
684 *Opinion in Plant Biology* [Internet]. 2006;9:515–22. Available from:  
685 <https://linkinghub.elsevier.com/retrieve/pii/S1369526606001178>

- 686 43. Guo A, Salih G, Klessig DF. Activation of a diverse set of genes during the tobacco  
687 resistance response to TMV is independent of salicylic acid; induction of a subset is also  
688 ethylene independent. *The Plant Journal* [Internet]. 2000;21:409–18. Available from:  
689 <http://doi.wiley.com/10.1046/j.1365-313x.2000.00692.x>
- 690 44. Quirino BF, Noh YS, Himelblau E, Amasino RM. Molecular aspects of leaf senescence.  
691 *Trends in Plant Science*. 2000;5:278–82.
- 692 45. Choi D, Bostock RM, Avdiushko S, Hildebrand DF. Lipid-derived signals that discriminate  
693 wound- and pathogen-responsive isoprenoid pathways in plants: methyl jasmonate and the  
694 fungal elicitor arachidonic acid induce different 3-hydroxy-3-methylglutaryl-coenzyme A  
695 reductase genes and antimicrobial isoprene. *Proceedings of the National Academy of Sciences*  
696 [Internet]. 1994;91:2329–33. Available from:  
697 <http://www.pnas.org/cgi/doi/10.1073/pnas.91.6.2329>
- 698 46. Sanchez DH, Gaubert H, Yang W. Evidence of developmental escape from transcriptional  
699 gene silencing in MESSI retrotransposons. *New Phytologist*. 2019;223:950–64.
- 700 47. Gallois P, Marinho P. Leaf Disk Transformation Using *Agrobacterium tumefaciens*-  
701 Expression of Heterologous Genes in Tobacco. *Plant Gene Transfer and Expression Protocols*  
702 [Internet]. New Jersey: Humana Press; 2003. p. 39–48. Available from:  
703 <http://link.springer.com/10.1385/0-89603-321-X:39>
- 704 48. Murashige T, Skoog F. A Revised Medium for Rapid Growth and Bio Assays with Tobacco  
705 Tissue Cultures. *Physiologia Plantarum* [Internet]. 1962;15:473–97. Available from:  
706 <http://doi.wiley.com/10.1111/j.1399-3054.1962.tb08052.x>
- 707 49. Schindelin J, Arganda-Carreras I, Frise E, Kaynig V, Longair M, Pietzsch T, et al. Fiji: An  
708 open-source platform for biological-image analysis. *Nature Methods*. 2012;9:676–82.
- 709 50. Lobet G, Pagès L, Draye X. A Novel Image-Analysis Toolbox Enabling Quantitative  
710 Analysis of Root System Architecture. *Plant Physiology*. 2011;157:29–39.
- 711 51. Maguire JD. Speed of Germination—Aid In Selection And Evaluation for Seedling  
712 Emergence And Vigor1. *Crop Science* [Internet]. 1962;2:176. Available from:  
713 <https://www.crops.org/publications/cs/abstracts/2/2/CS0020020176>

- 714 52. Bolger AM, Lohse M, Usadel B. Trimmomatic: A flexible trimmer for Illumina sequence  
715 data. *Bioinformatics*. 2014;30:2114–20.
- 716 53. Edwards KD, Fernandez-Pozo N, Drake-Stowe K, Humphry M, Evans AD, Bombarely A,  
717 et al. A reference genome for *Nicotiana tabacum* enables map-based cloning of homeologous  
718 loci implicated in nitrogen utilization efficiency. *BMC Genomics*. *BMC Genomics*; 2017;18:1–  
719 14.
- 720 54. Kim D, Langmead B, Salzberg SL. HISAT: A fast spliced aligner with low memory  
721 requirements. *Nature Methods*. 2015;12:357–60.
- 722 55. Robinson MD, McCarthy DJ, Smyth GK. edgeR: A Bioconductor package for differential  
723 expression analysis of digital gene expression data. *Bioinformatics*. 2009;26:139–40.
- 724 56. Mortazavi A, Williams BA, McCue K, Schaeffer L, Wold B. Mapping and quantifying  
725 mammalian transcriptomes by RNA-Seq. *Nature Methods*. 2008;5:621–8.
- 726 57. Conesa A, Götz S. Blast2GO: A comprehensive suite for functional analysis in plant  
727 genomics. *International Journal of Plant Genomics*. 2008;2008.
- 728 58. Lopes FM, Martins DC, Cesar RM. Feature selection environment for genomic applications.  
729 *BMC Bioinformatics*. 2008;9:1–8.
- 730 59. Dai X, Zhuang Z, Zhao PX. PsRNATarget: A plant small RNA target analysis server (2017  
731 release). *Nucleic Acids Research*. Oxford University Press; 2018;46:W49–54.
- 732 60. Green MR, Sambrook J. *Molecular Cloning: A Laboratory Manual*. 4th ed. Cold Spring  
733 Harbor Laboratory Press. New York: Cold Spring Harbor; 2012.

734

735

736

737

738

739

740 **TABLES**

741 **Table 1.** Leaf size comparison between 15 days old seedlings of WT and HP lines (T4).

| Line | Total leaf area (mm <sup>2</sup> ) | Total leaf length (mm)    |
|------|------------------------------------|---------------------------|
| WT   | 135.26 ± 31.86 <sup>a</sup>        | 17.20 ± 3.14 <sup>a</sup> |
| HP8  | 147.05 ± 44.41 <sup>a</sup>        | 17.27 ± 3.51 <sup>a</sup> |
| HP13 | 175.86 ± 34.71 <sup>b</sup>        | 19.75 ± 2.68 <sup>b</sup> |

742 Letters indicate statistically significant differences (p-value ≤ 0.05). Total leaf length was  
743 measured as the maximum distance across the longer longitudinal axis of the two leaves.  
744

745 **Table 2.** Comparison between the root system of 15 days old WT and HP seedlings.

| Sample            | Line | Length (cm)               | Surface (cm <sup>2</sup> ) | Volume (cm <sup>3</sup> )    | Number of lateral roots   |
|-------------------|------|---------------------------|----------------------------|------------------------------|---------------------------|
| Primary root      | WT   | 5.14 ± 0.87 <sup>b</sup>  | 0.68 ± 0.24 <sup>b</sup>   | 0.0079 ± 0.0044 <sup>b</sup> | 9.30 ± 2.67 <sup>b</sup>  |
|                   | HP8  | 3.83 ± 0.58 <sup>a</sup>  | 0.40 ± 0.07 <sup>a</sup>   | 0.0036 ± 0.0009 <sup>a</sup> | 6.00 ± 2.54 <sup>a</sup>  |
|                   | HP13 | 4.22 ± 0.88 <sup>a</sup>  | 0.46 ± 0.12 <sup>a</sup>   | 0.0042 ± 0.0015 <sup>a</sup> | 7.77 ± 2.86 <sup>ab</sup> |
| Total root system | WT   | 11.36 ± 3.65 <sup>b</sup> | 1.34 ± 0.52 <sup>b</sup>   | 0.0140 ± 0.0078 <sup>b</sup> | NA                        |
|                   | HP8  | 7.49 ± 2.31 <sup>a</sup>  | 0.73 ± 0.24 <sup>a</sup>   | 0.0060 ± 0.0025 <sup>a</sup> | NA                        |
|                   | HP13 | 8.72 ± 2.89 <sup>ab</sup> | 0.92 ± 0.40 <sup>a</sup>   | 0.0082 ± 0.0047 <sup>a</sup> | NA                        |

746 NA – Not applicable. Letters indicate statistically significant differences (p-value ≤ 0.05).  
747

748 **Table 3.** Germination comparison between fresh and six years old seeds from WT and HP lines.

| Seed age      | Line | Mean germination time (days) | Germination speed index    | Germination rate (%)       |
|---------------|------|------------------------------|----------------------------|----------------------------|
| Six years old | WT   | 5.68 ± 0.45 <sup>c</sup>     | 4.26 ± 0.64 <sup>c</sup>   | 94.67 ± 9.24 <sup>b</sup>  |
|               | HP1  | 6.79 ± 0.19 <sup>bc</sup>    | 3.46 ± 0.30 <sup>bc</sup>  | 89.33 ± 4.62 <sup>b</sup>  |
|               | HP5  | 9.26 ± 1.33 <sup>a</sup>     | 2.52 ± 0.21 <sup>a</sup>   | 89.28 ± 6.02 <sup>b</sup>  |
|               | HP8  | 7.35 ± 0.44 <sup>abc</sup>   | 3.07 ± 0.55 <sup>abc</sup> | 85.49 ± 12.27 <sup>b</sup> |
|               | HP13 | 8.53 ± 0.04 <sup>ab</sup>    | 2.00 ± 0.28 <sup>ab</sup>  | 58.93 ± 7.18 <sup>a</sup>  |
| Fresh         | WT   | 6.17 ± 0.07 <sup>b</sup>     | 3.81 ± 0.31 <sup>b</sup>   | 98.67 ± 2.31 <sup>a</sup>  |
|               | HP8  | 7.53 ± 0.25 <sup>a</sup>     | 3.35 ± 0.15 <sup>a</sup>   | 96.00 ± 4.00 <sup>a</sup>  |
|               | HP13 | 7.33 ± 0.38 <sup>a</sup>     | 3.18 ± 0.35 <sup>a</sup>   | 89.33 ± 6.11 <sup>a</sup>  |

749 Letters indicate statistically significant differences (p-value ≤ 0.05).  
750

751 **ADDITIONAL FILES**

752 **Additional file 1: Figure S1.** Tnt1 retrotransposon structure and RNAi construct used to  
753 interfere with Tnt1 levels of transcripts. **Figure S2.** Expression of circadian clock genes and GO  
754 categorization of modulated genes in HP lines. **Figure S3.** Diagram of a gene regulatory  
755 network observed exclusively in HP plants. **Figure S4.** Phenotypes found in roots of HP lines.  
756 **Figure S5.** Germination performance of fresh and 6-years-old seeds.

757

758

## 759 **FIGURE LEGENDS**

760

761 **Figure 1.** Dynamics of Tnt1 and ethylene emission in WT and HP lines. **(A)** Relative  
762 expression of three Tnt1 domains in 60-days-old plants measured by qRT-PCR. Tnt1 expression  
763 is induced upon exogenous ethylene application (10  $\mu$ L/mL for 24hs). Control plants were  
764 incubated in sealed containers without input of ethylene. **(B)** Ethylene emission in 90-day-old  
765 HP plants measured by gas chromatography. Bars indicate standard error. Significance of the  
766 difference between HP and WT was assessed by a one-tailed Student's t-test: (\*\*) significant at  
767 the 0.004 level; (\*) significant at the 0.017 level.

768

769 **Figure 2.** Relative expression of ethylene-related genes and Tnt1 in 15-days-old WT plants  
770 throughout 48 hours period. Plants were grown under a 12 hours light / 12 hours dark regime.  
771 Gray areas indicate dark periods. The lowest expression value for each gene was set to one. Bars  
772 represent standard deviation between three biological replicates, except for Tnt1 U3A, for which  
773 bars represent the standard deviation between three technical replicates.

774

775 **Figure 3.** Relative expression of ethylene-related genes and Tnt1 in 90-day-old WT and HP  
776 plants. The expression level of WT was set as one for each gene. Values are linear average, with  
777 bars showing standard errors. Leaves used to extract the RNA for the quantitative PCRs were  
778 from the same plants used for the ethylene gas chromatography (Figure 1A).

779

780 **Figure 4.** Hierarchical clustering analysis of 932 differentially expressed genes across different  
781 tobacco lines. Each column represents a biological replicate. Control line was transformed with  
782 a vector containing only the resistance gene.

783

784 **Figure 5.** Gene ontology (GO) enrichment analysis ( $p$ -value  $\leq 0.01$ ) of the 932 differentially  
785 expressed genes between wild-type and hairpin lines. Only the 20 most representative biological  
786 processes are shown. Red boxes highlight processes related to stress response and homeostasis  
787 maintenance. The reference includes all expressed genes in all sequenced samples.

788

789 **Figure 6.** Phenotypes of aerial parts in transgenic RNAi lines. **(A)** Leaves of wild-type (WT)  
790 and transgenic (HP) *Nicotiana tabacum* plants growing *in vitro*. Wild type presents normal  
791 leaves while HP lineages present cell death spots. Left panel (WT, T1 and T2) displays leaves of  
792 45-days-old plants used for the transcriptome sequencing. **(B)** Total leaf area and total leaf  
793 length (measured from the first leaf pair) of 15-days-old seedlings. Letters represent statistically  
794 significant differences between lineages.

795

796 **Figure 7.** Phenotypes of the root system in transgenic RNAi lines. **(A)** Primary root of wild-  
797 type (WT) and transgenic (HP) lines. Root hair production is increased in HP lines. **(B)**  
798 Comparison of morphological parameters in the primary roots of WT and HP 15-days-old  
799 seedlings. Letters represent statistically significant differences between lineages.

800

801 **Figure 8.** Germination progress in wild-type (WT) and transgenic RNAi (HP) lines. Seeds were  
802 observed from 6 to 15 days after sowing. Orange area represents the percentage of seeds  
803 displaying root emergence, while green denotes seedlings in which both root and cotyledon  
804 emergence had occurred.

805

806 **Figure 9.** The discovery of putative Tnt1-derived GCC-box small RNAs in the promoter region  
807 of Tnt1A. Tnt1 retrotransposon genomic and transcript structures. The text box below the Tnt1

808 scheme represents the 3' U3 region sequence of Tnt1A. Green underlined words indicate the 3  
809 GCC-like motifs and TATA box is in blue. Bottom figure depicts the folding prediction of a 98  
810 bp part of the Tnt1A mRNA sequence containing the three GCC-like boxes (green rectangles).

811

812 **Figure 10.** Model proposing a dynamic equilibrium between expression of defense response  
813 genes and Tnt1 in WT tobacco. Expression values are based on our observations, except for  
814 ethylene biosynthesis and responsive genes during defense/stress response, for which values are  
815 hypothetical. During normal development (T0 – T7), ethylene biosynthetic/responsive genes are  
816 expressed in a circadian fashion, while Tnt1 fluctuates within basal range with no clearly  
817 delimited periodicity (depicted as a blue cloud). Upon stress stimulus, ethylene biosynthesis is  
818 upregulated, which also induces expression of genes that contain GCC motifs in their promoter,  
819 including Tnt1A (T8). Tnt1-U3A GCC-like motifs sRNAs overcomes ethylene induction and  
820 promotes transcriptional inhibition of GCC motifs in other ethylene-responsive gene promoters  
821 (T8 – T9). Expression of Tnt1 and ethylene-responsive genes returns to normal levels due to the  
822 repression mediated by its own sRNA (T9 – T12).

A

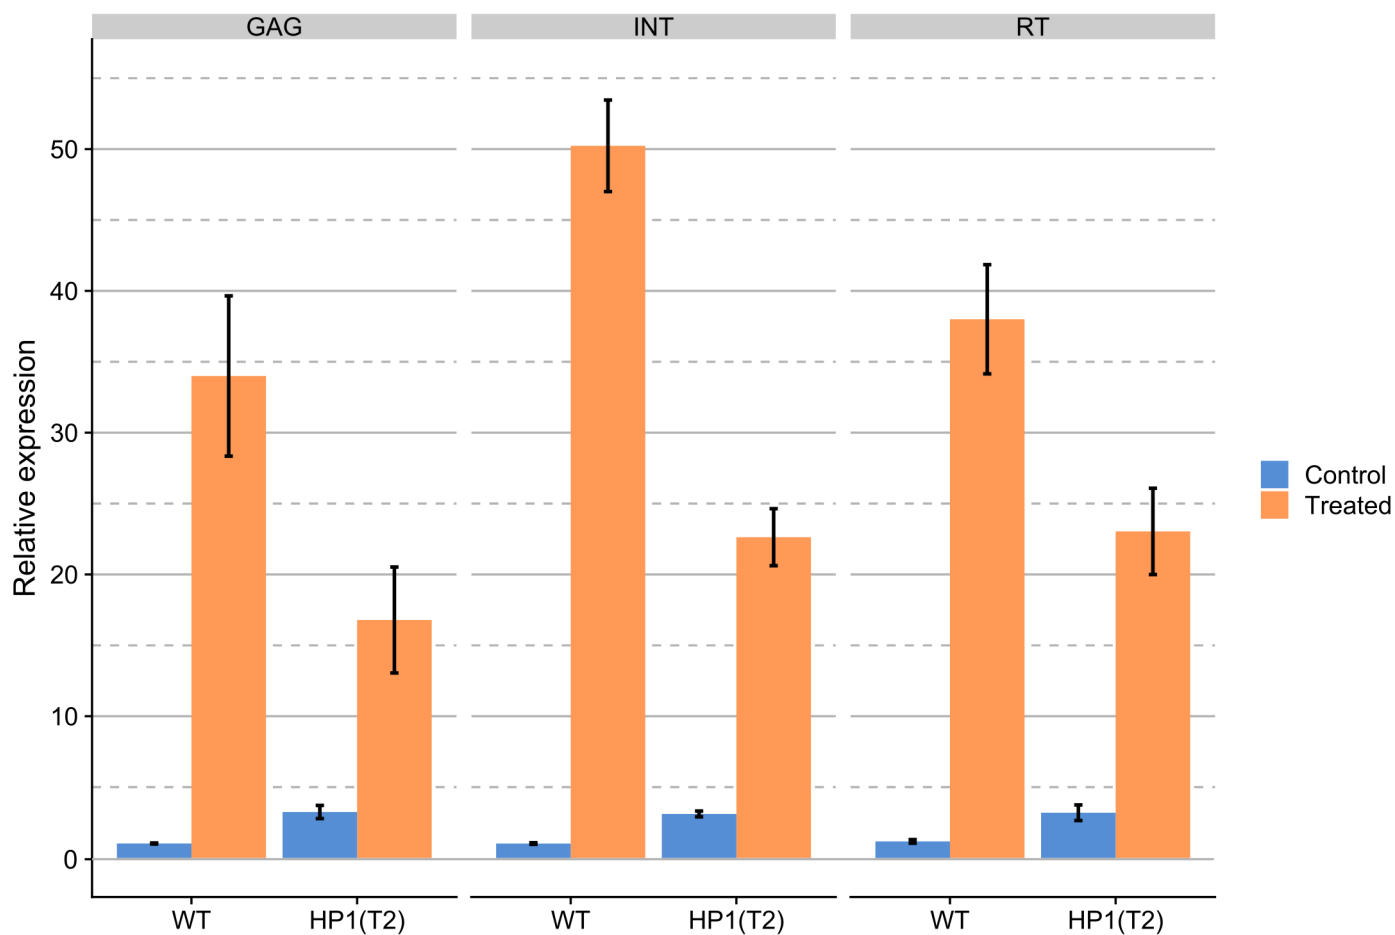

B

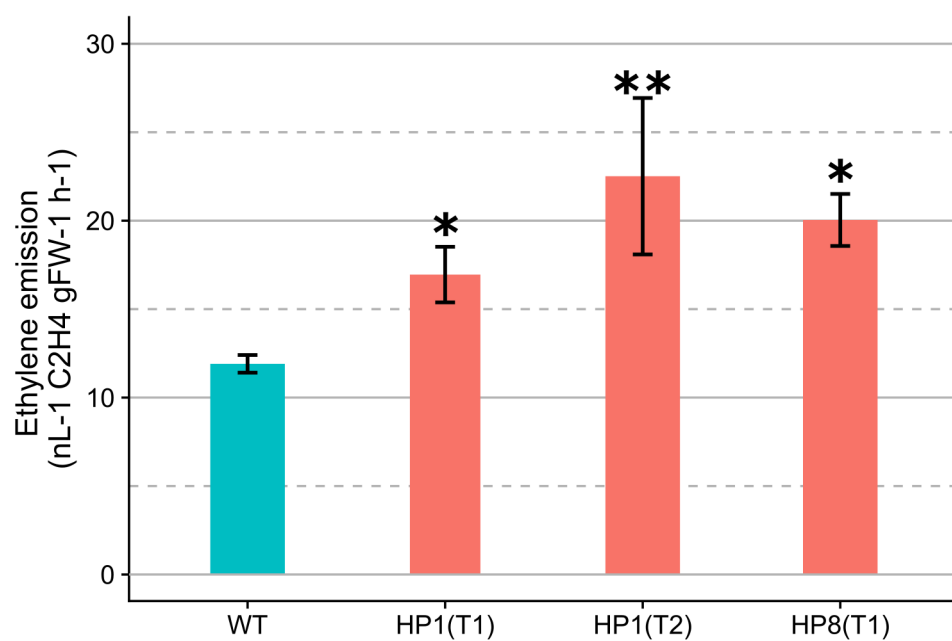



A

## Biosynthesis

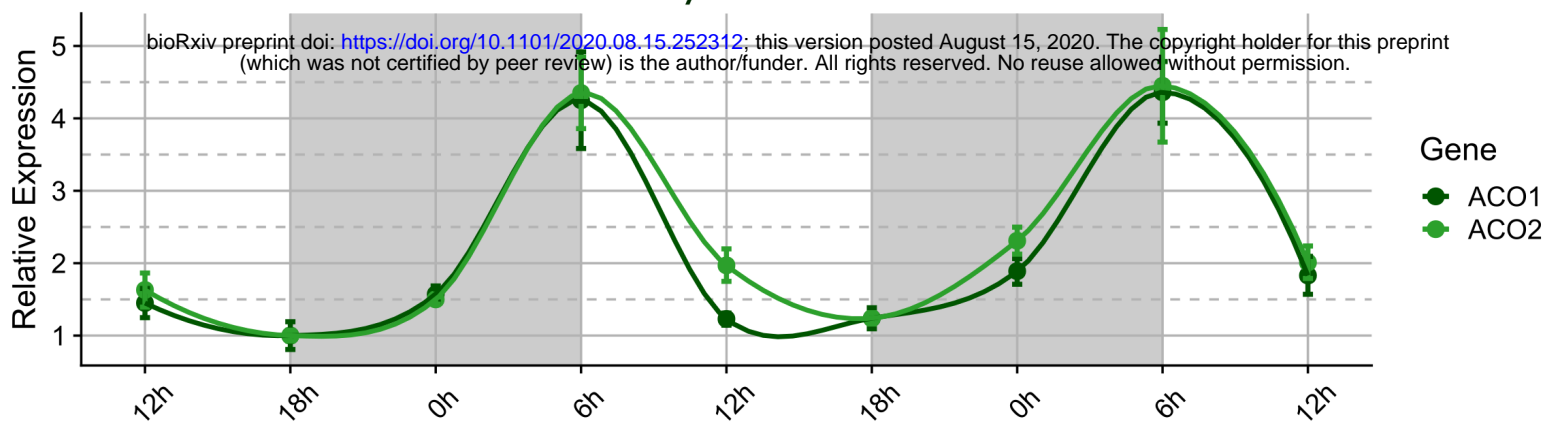

B

## Response

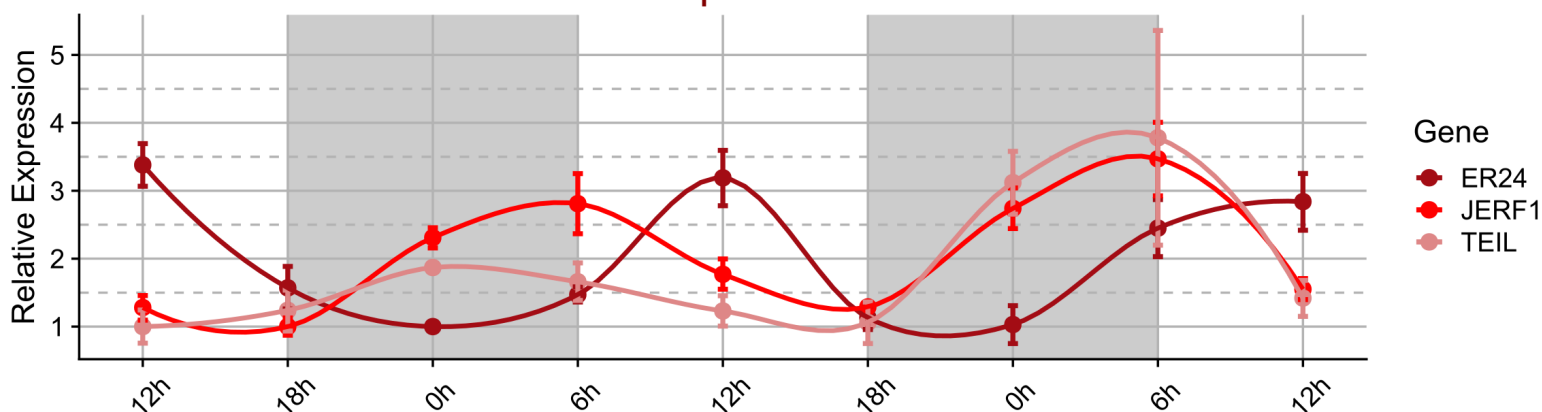

C

## Tnt1

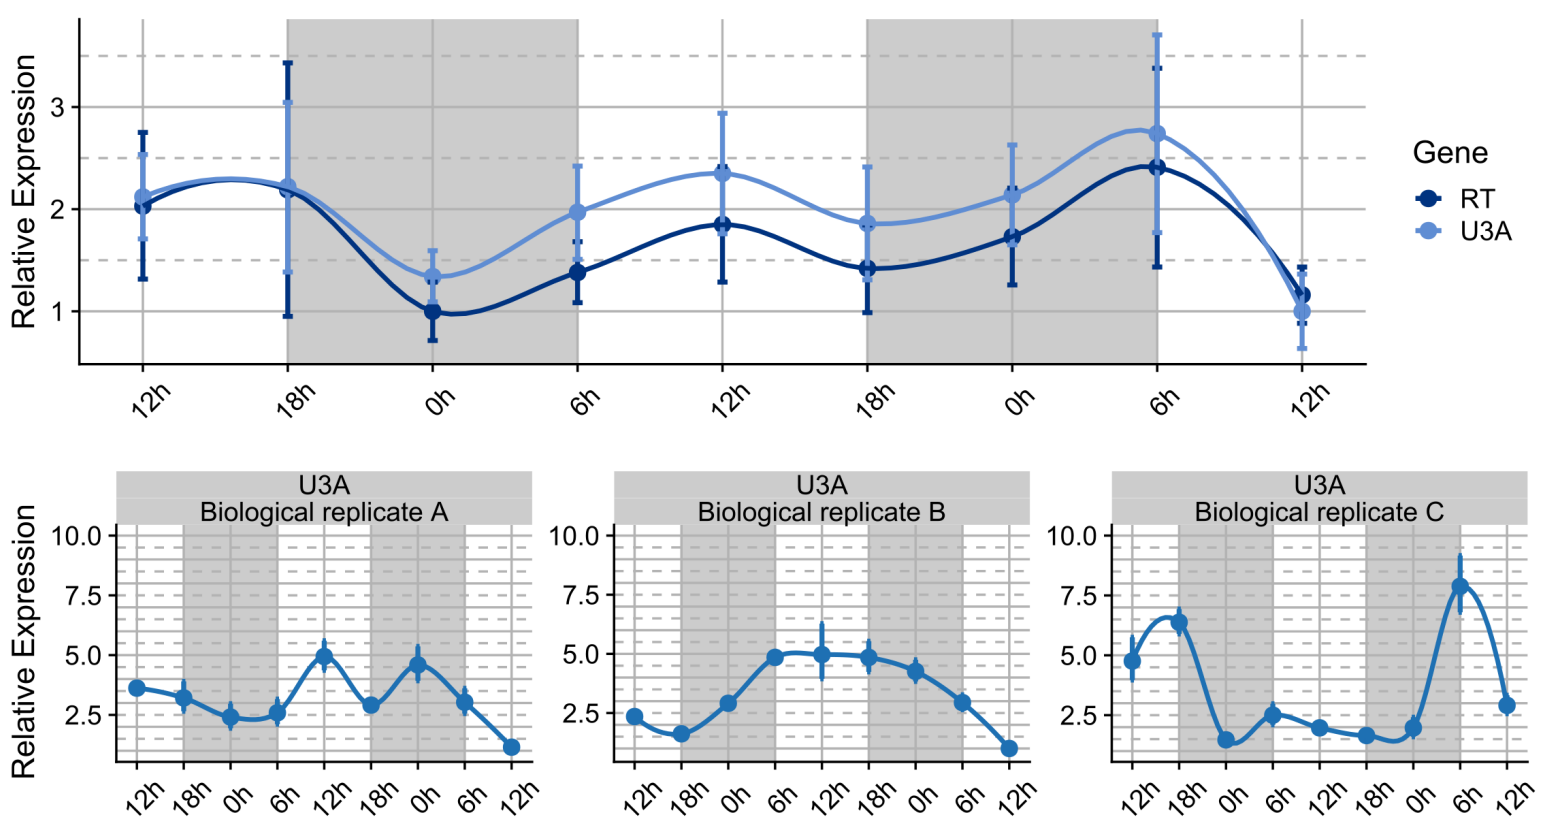

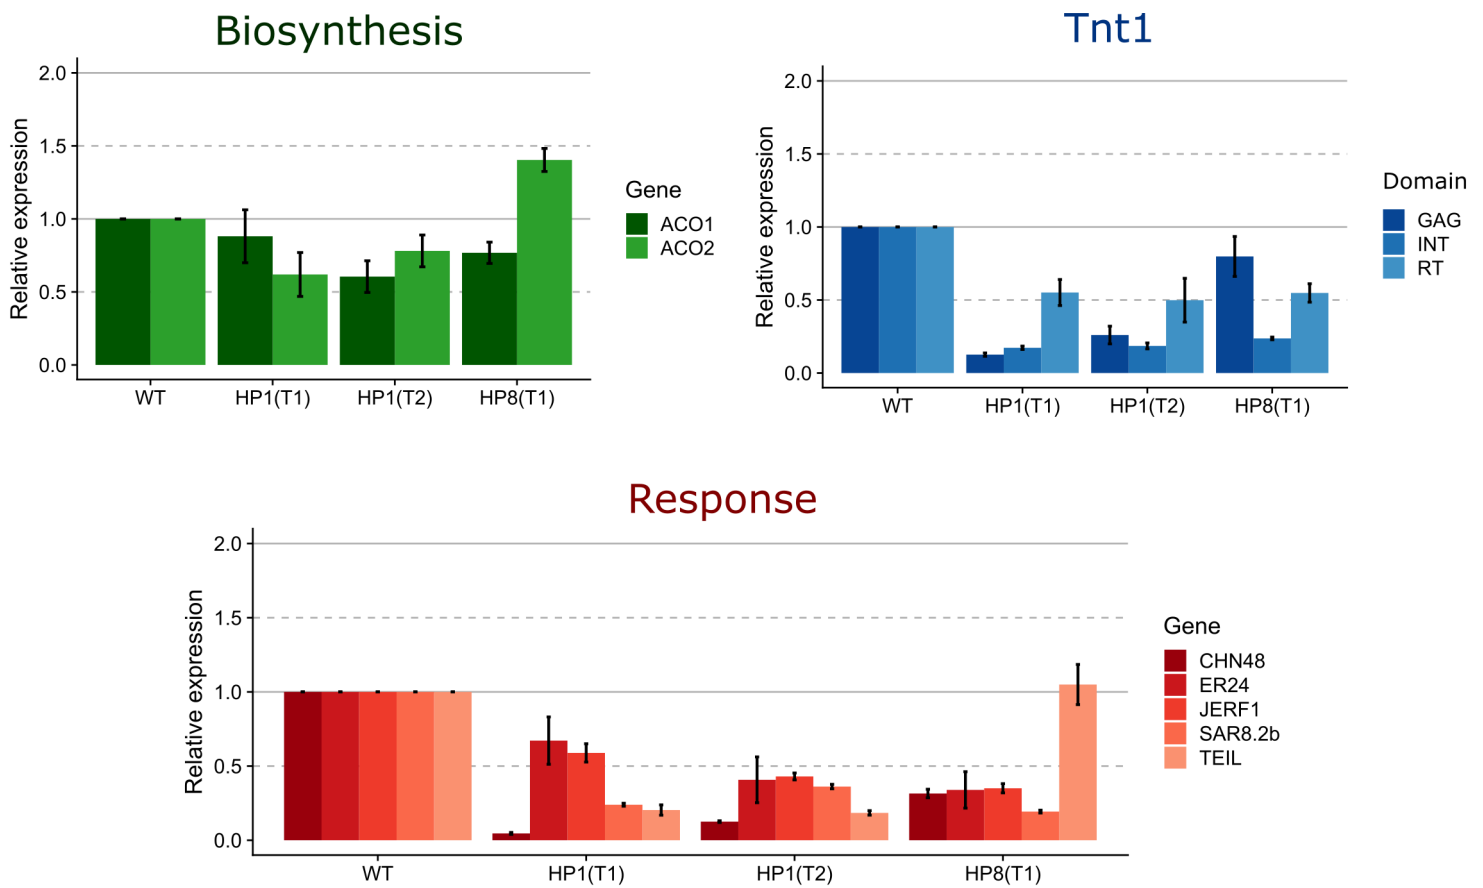

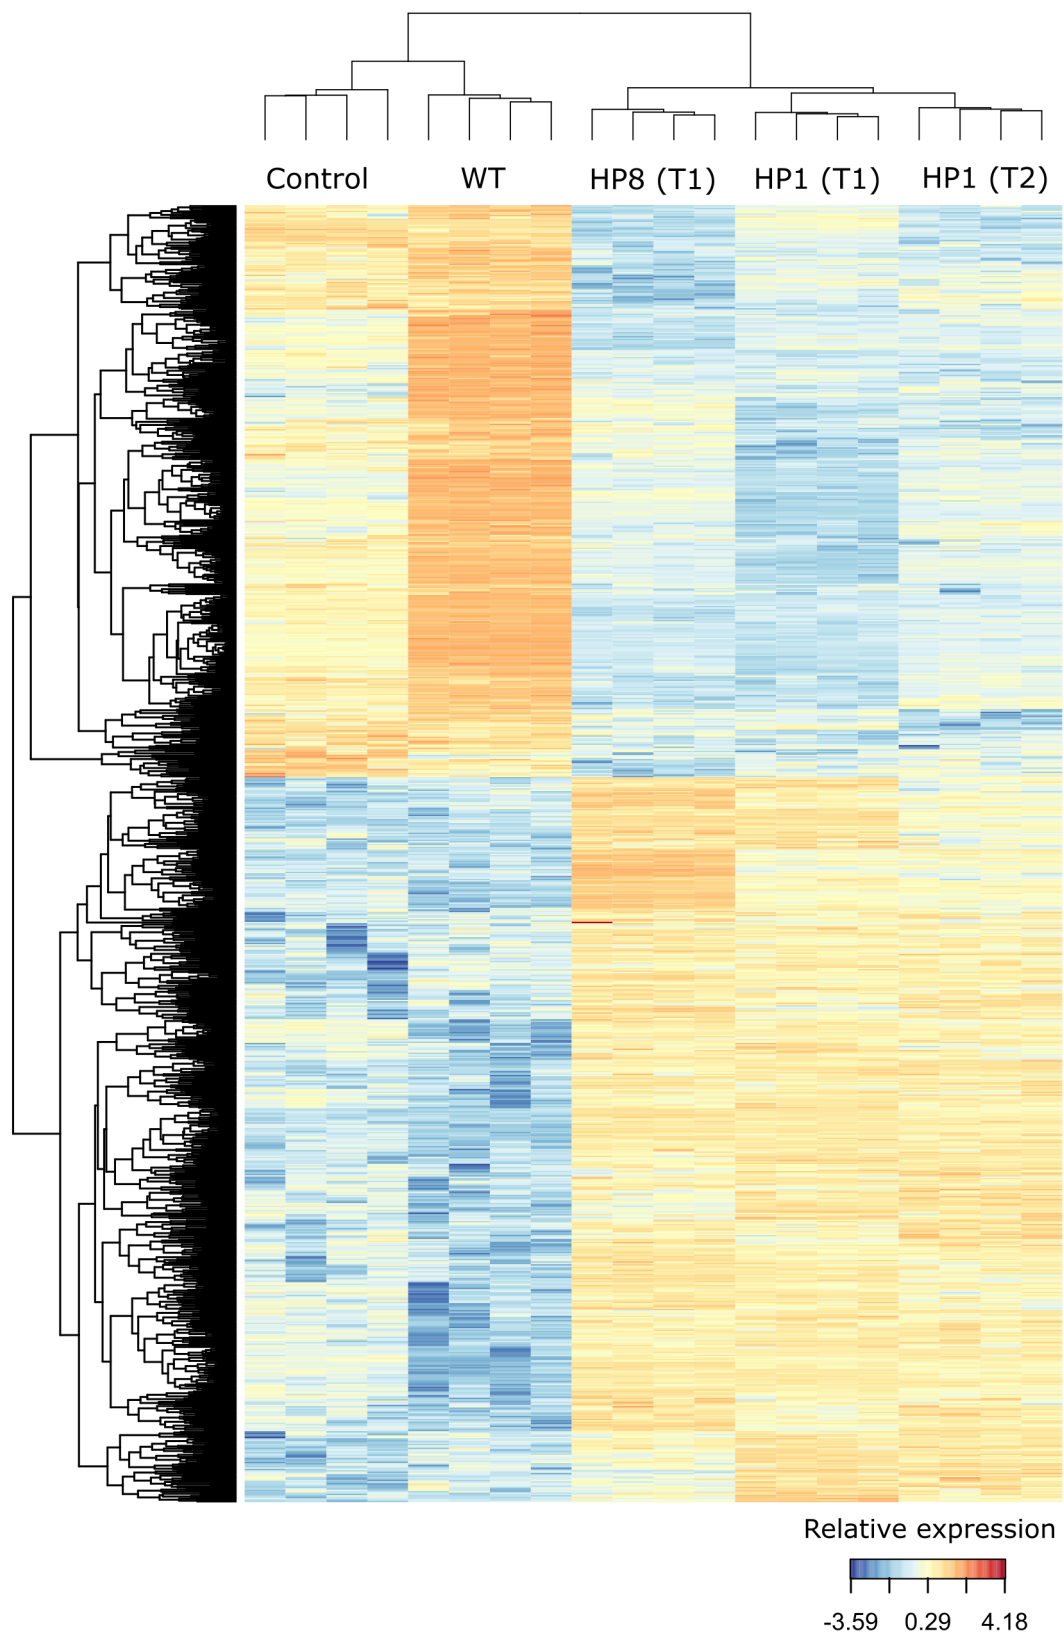

## Upregulated

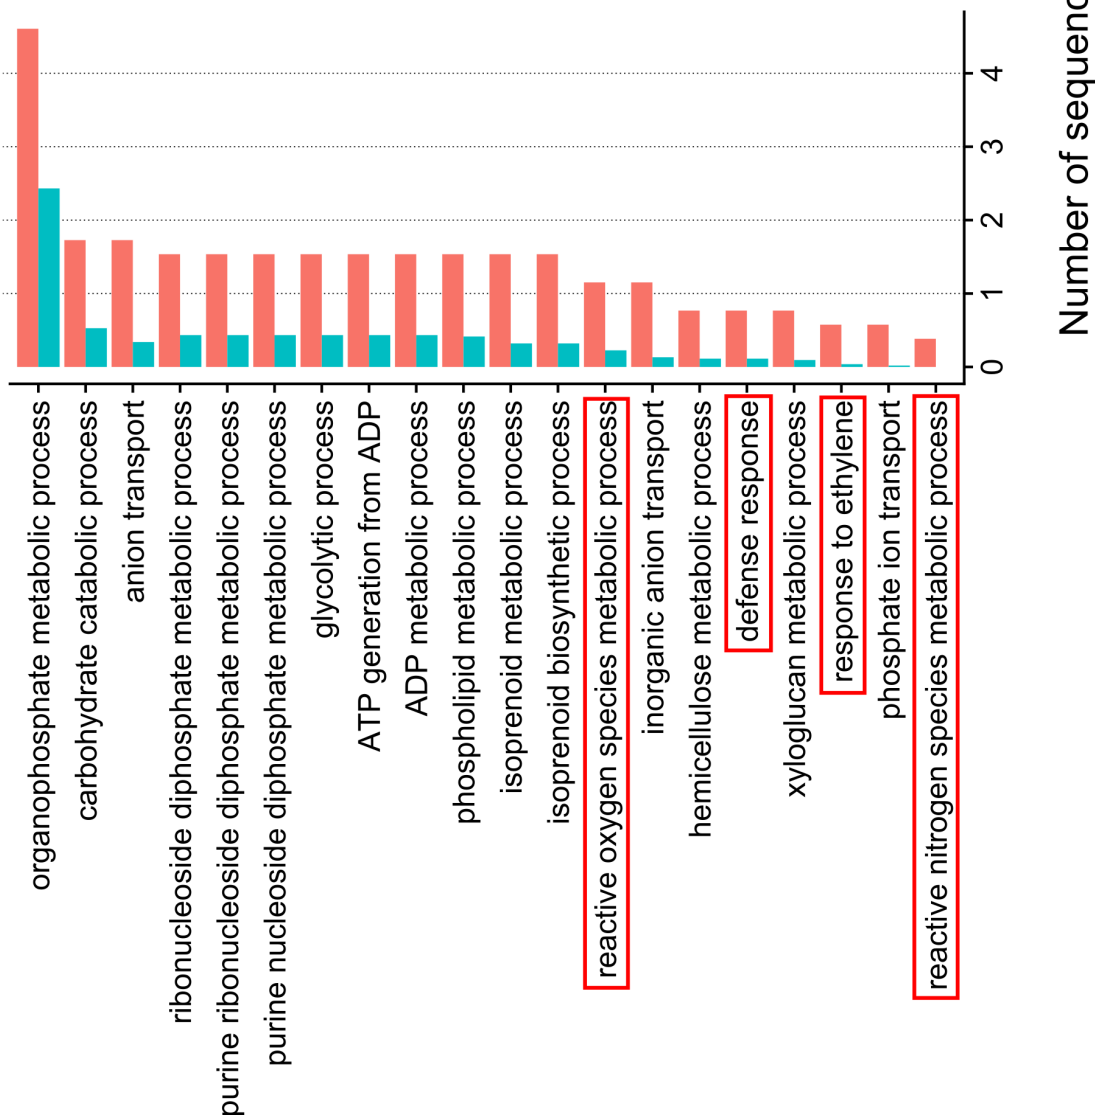

## Downregulated

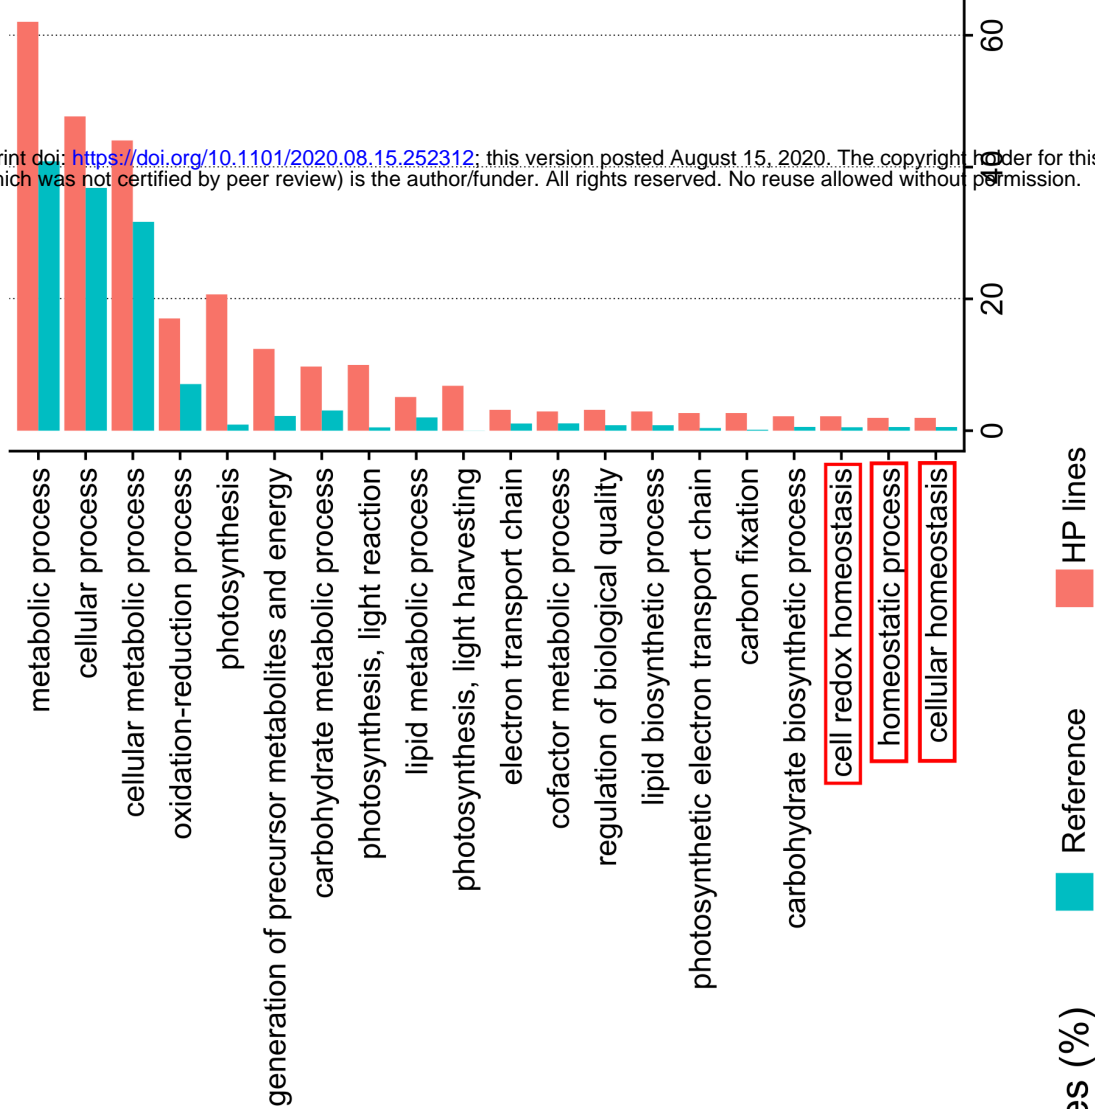

Number of sequences (%)

Reference

HP lines

A

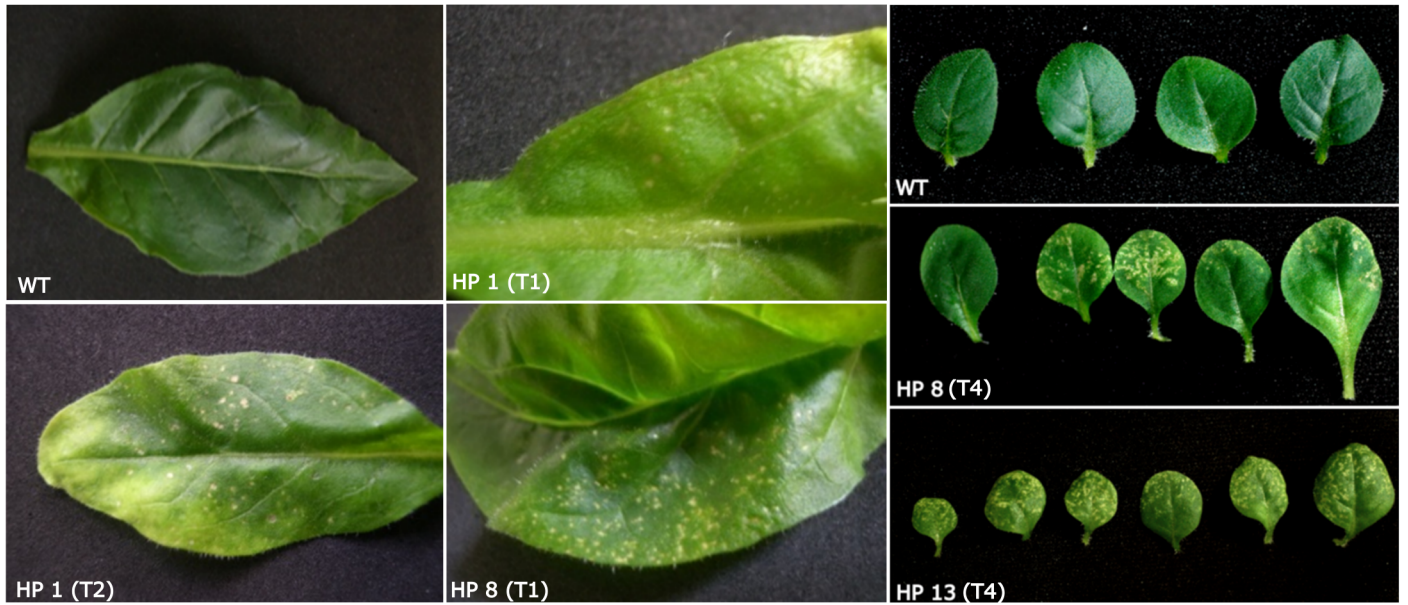

B

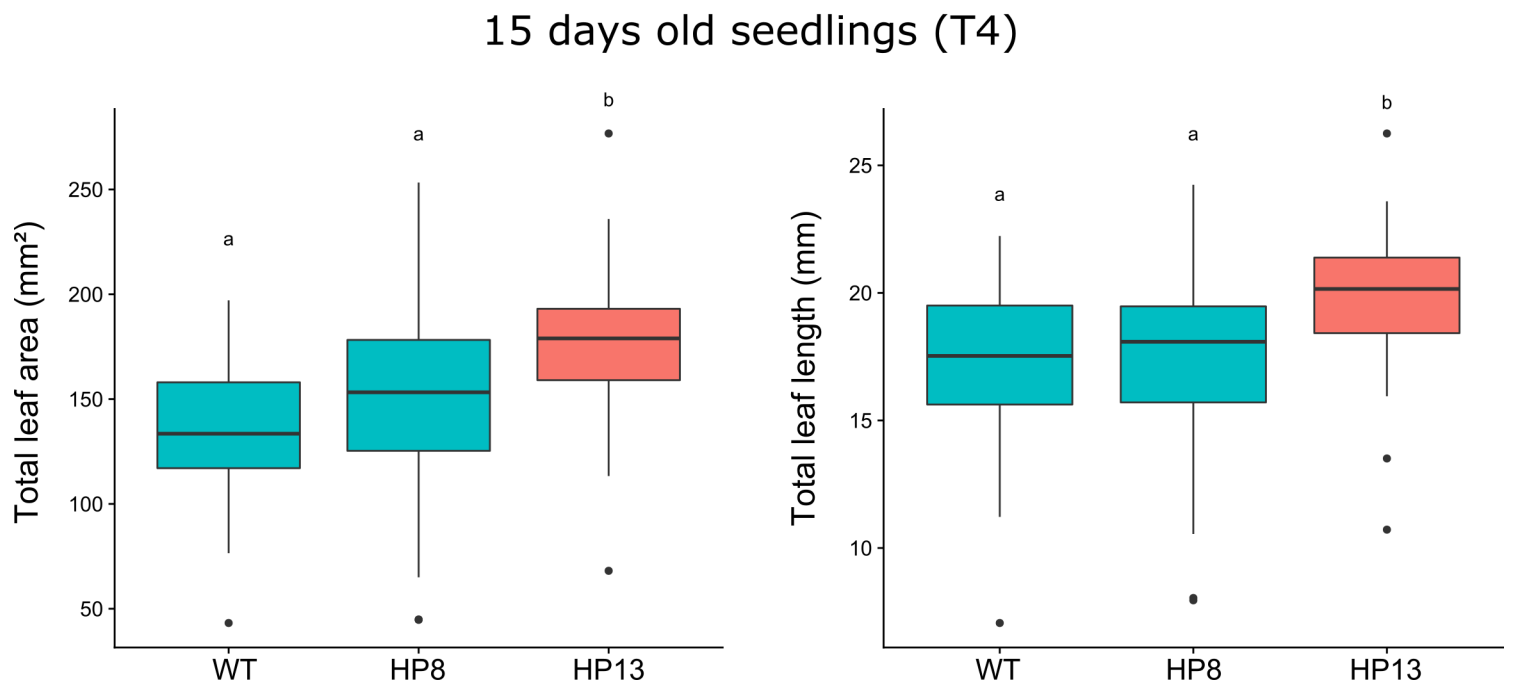

A

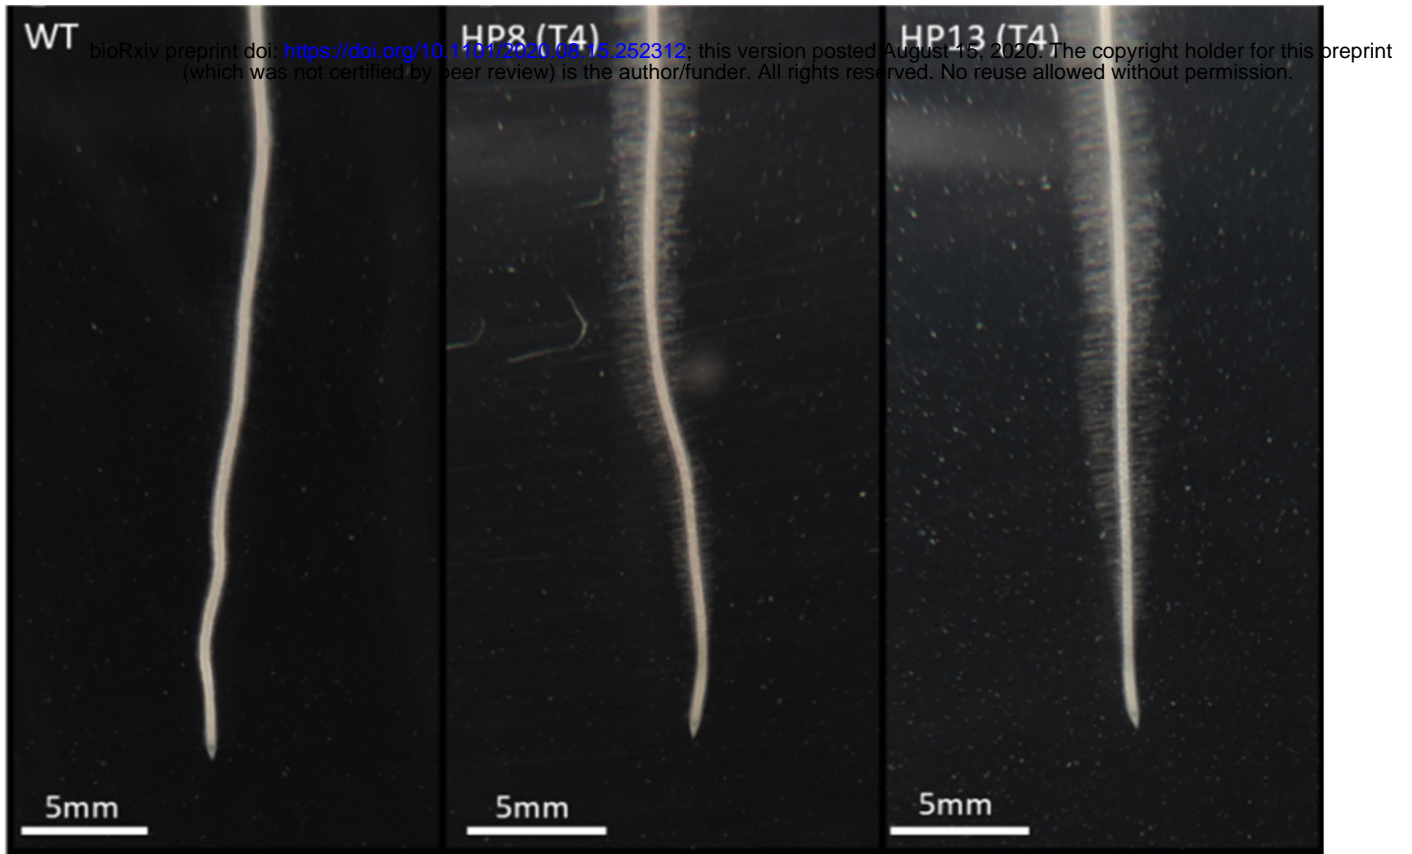

B

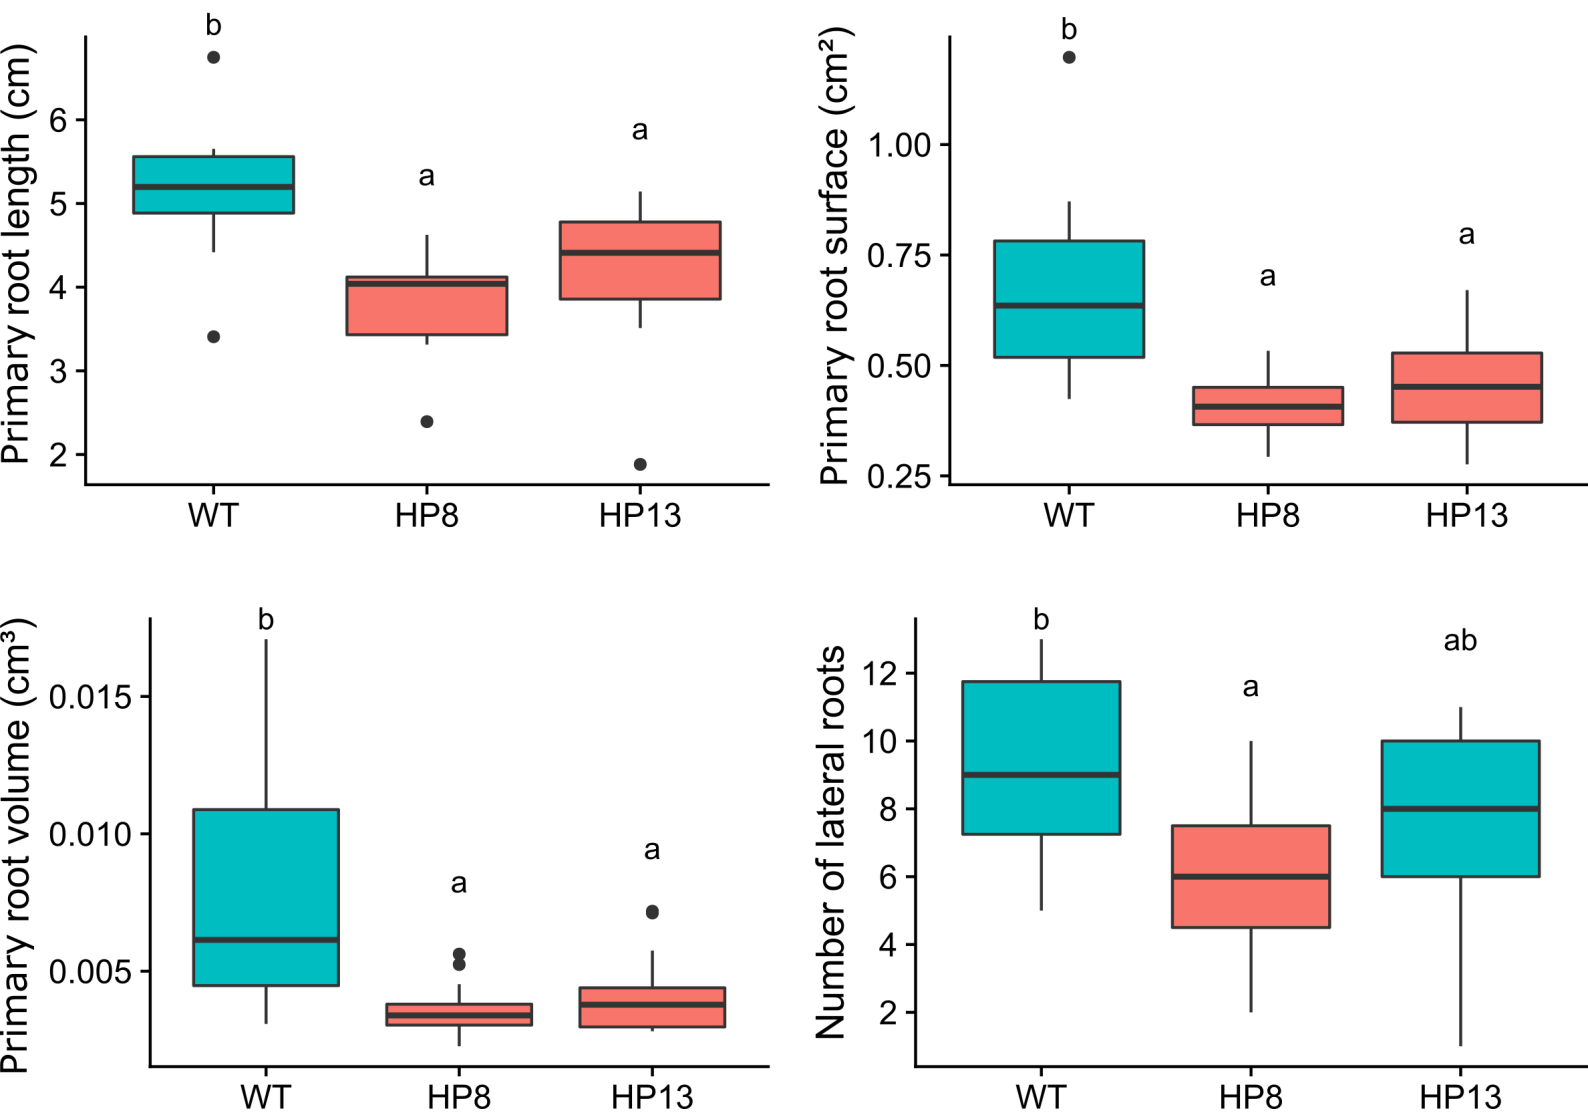

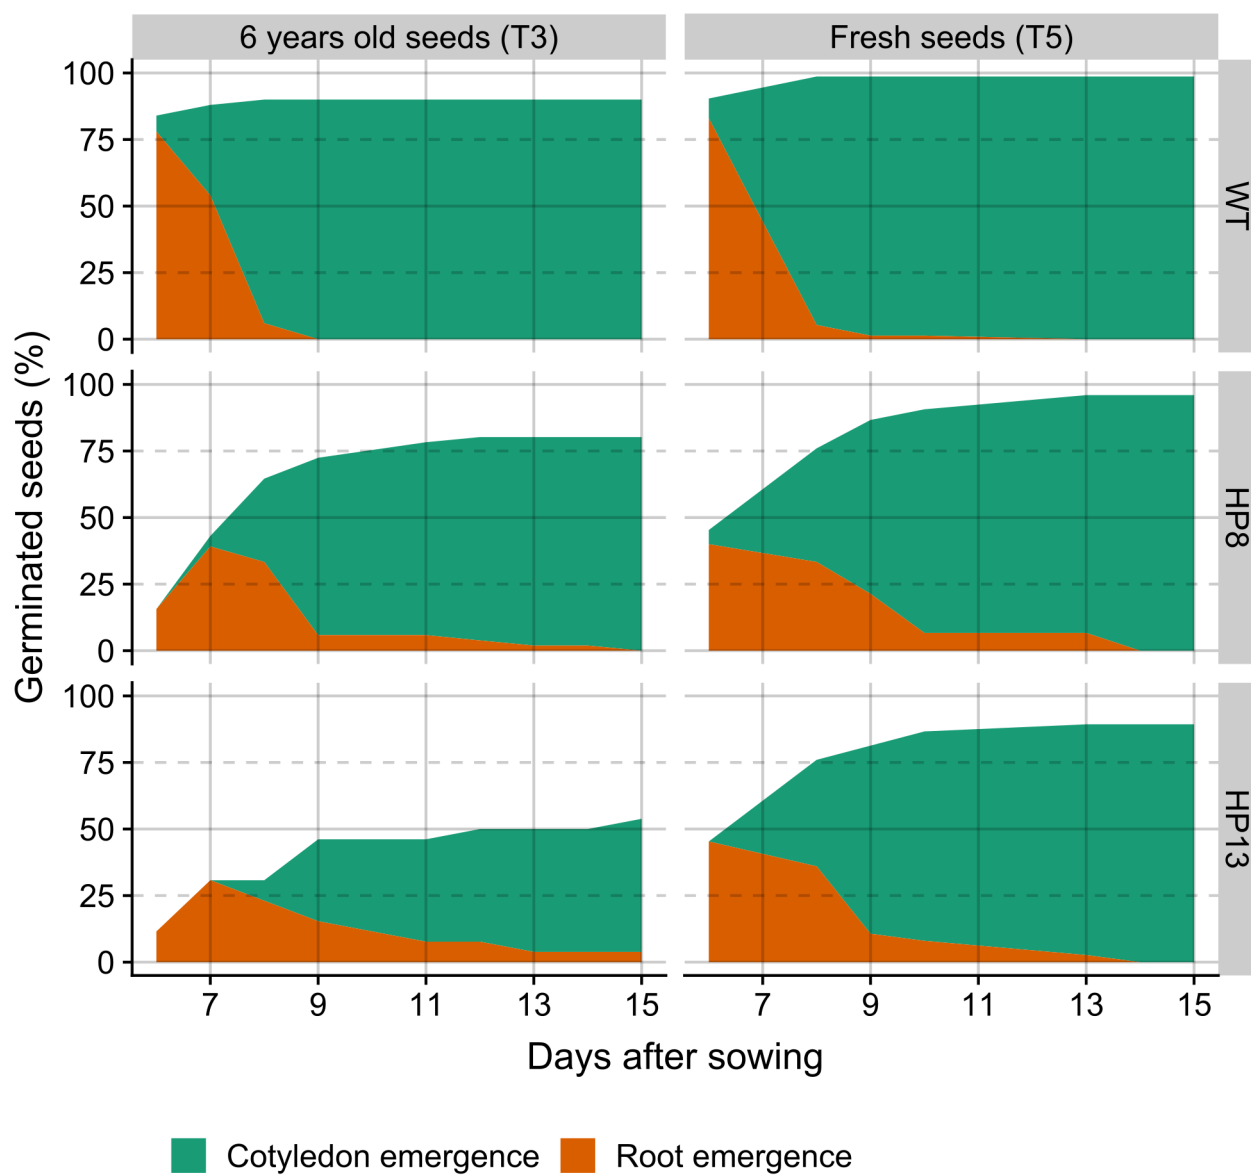

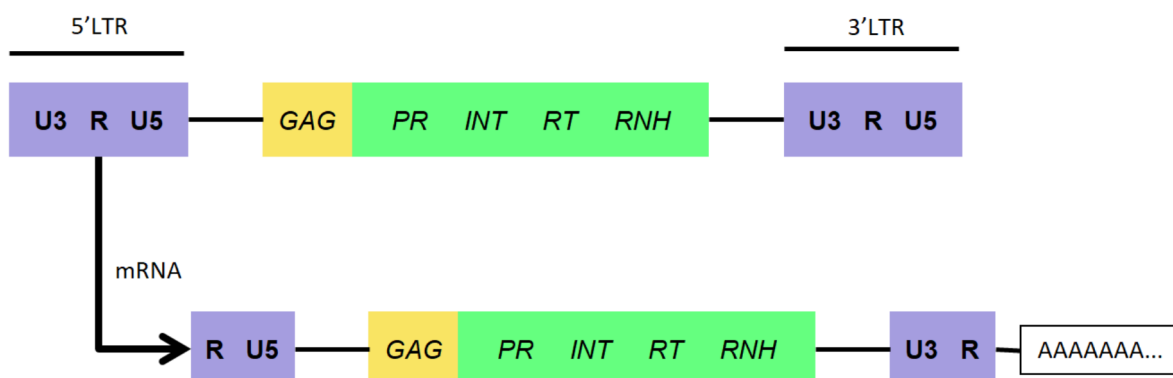

TTTCTTTGGTTTGGT **AGCCAACC** TTGTTGACTTGGTTTGGTTGGT **AGCCAACC**  
 TTGTTGAATCCTTGTGGATTGGT **AGCCAACC** TTTGTTGAATTGTGAAAAATGT  
 GTGTAAATTGTCAAATATTGTAGGCTTTAGAGGGTGAAGCTTTGGCT**TATAAAA**

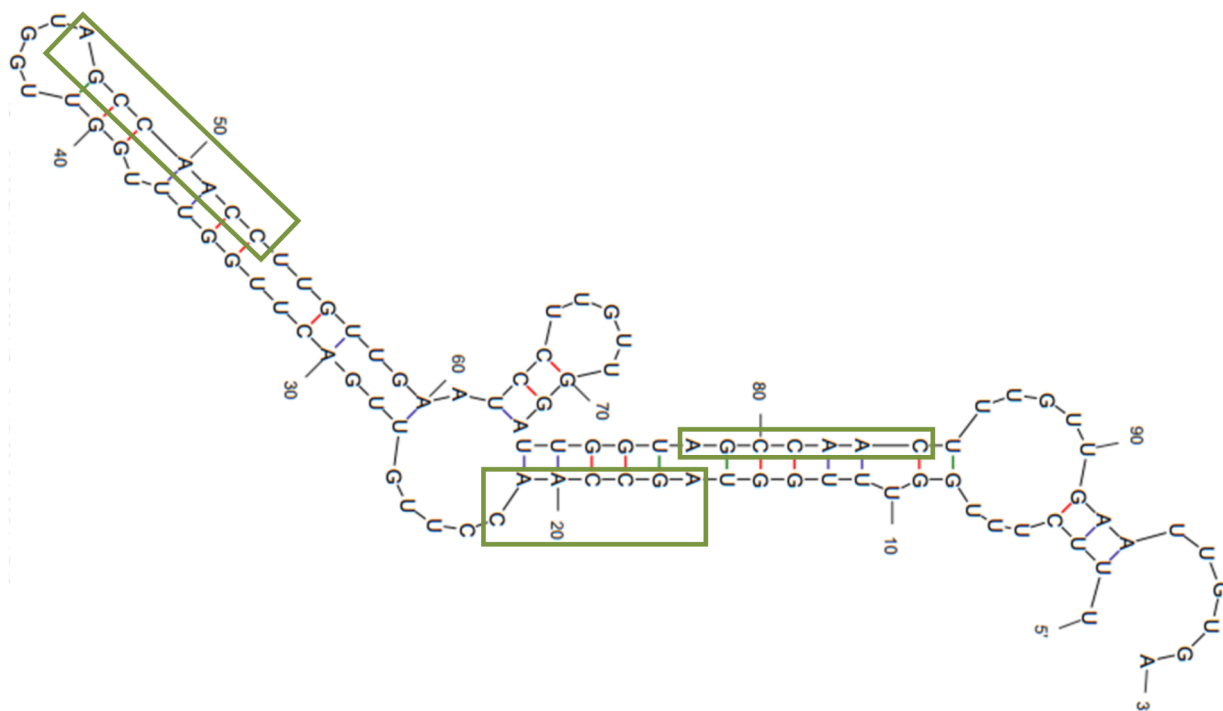



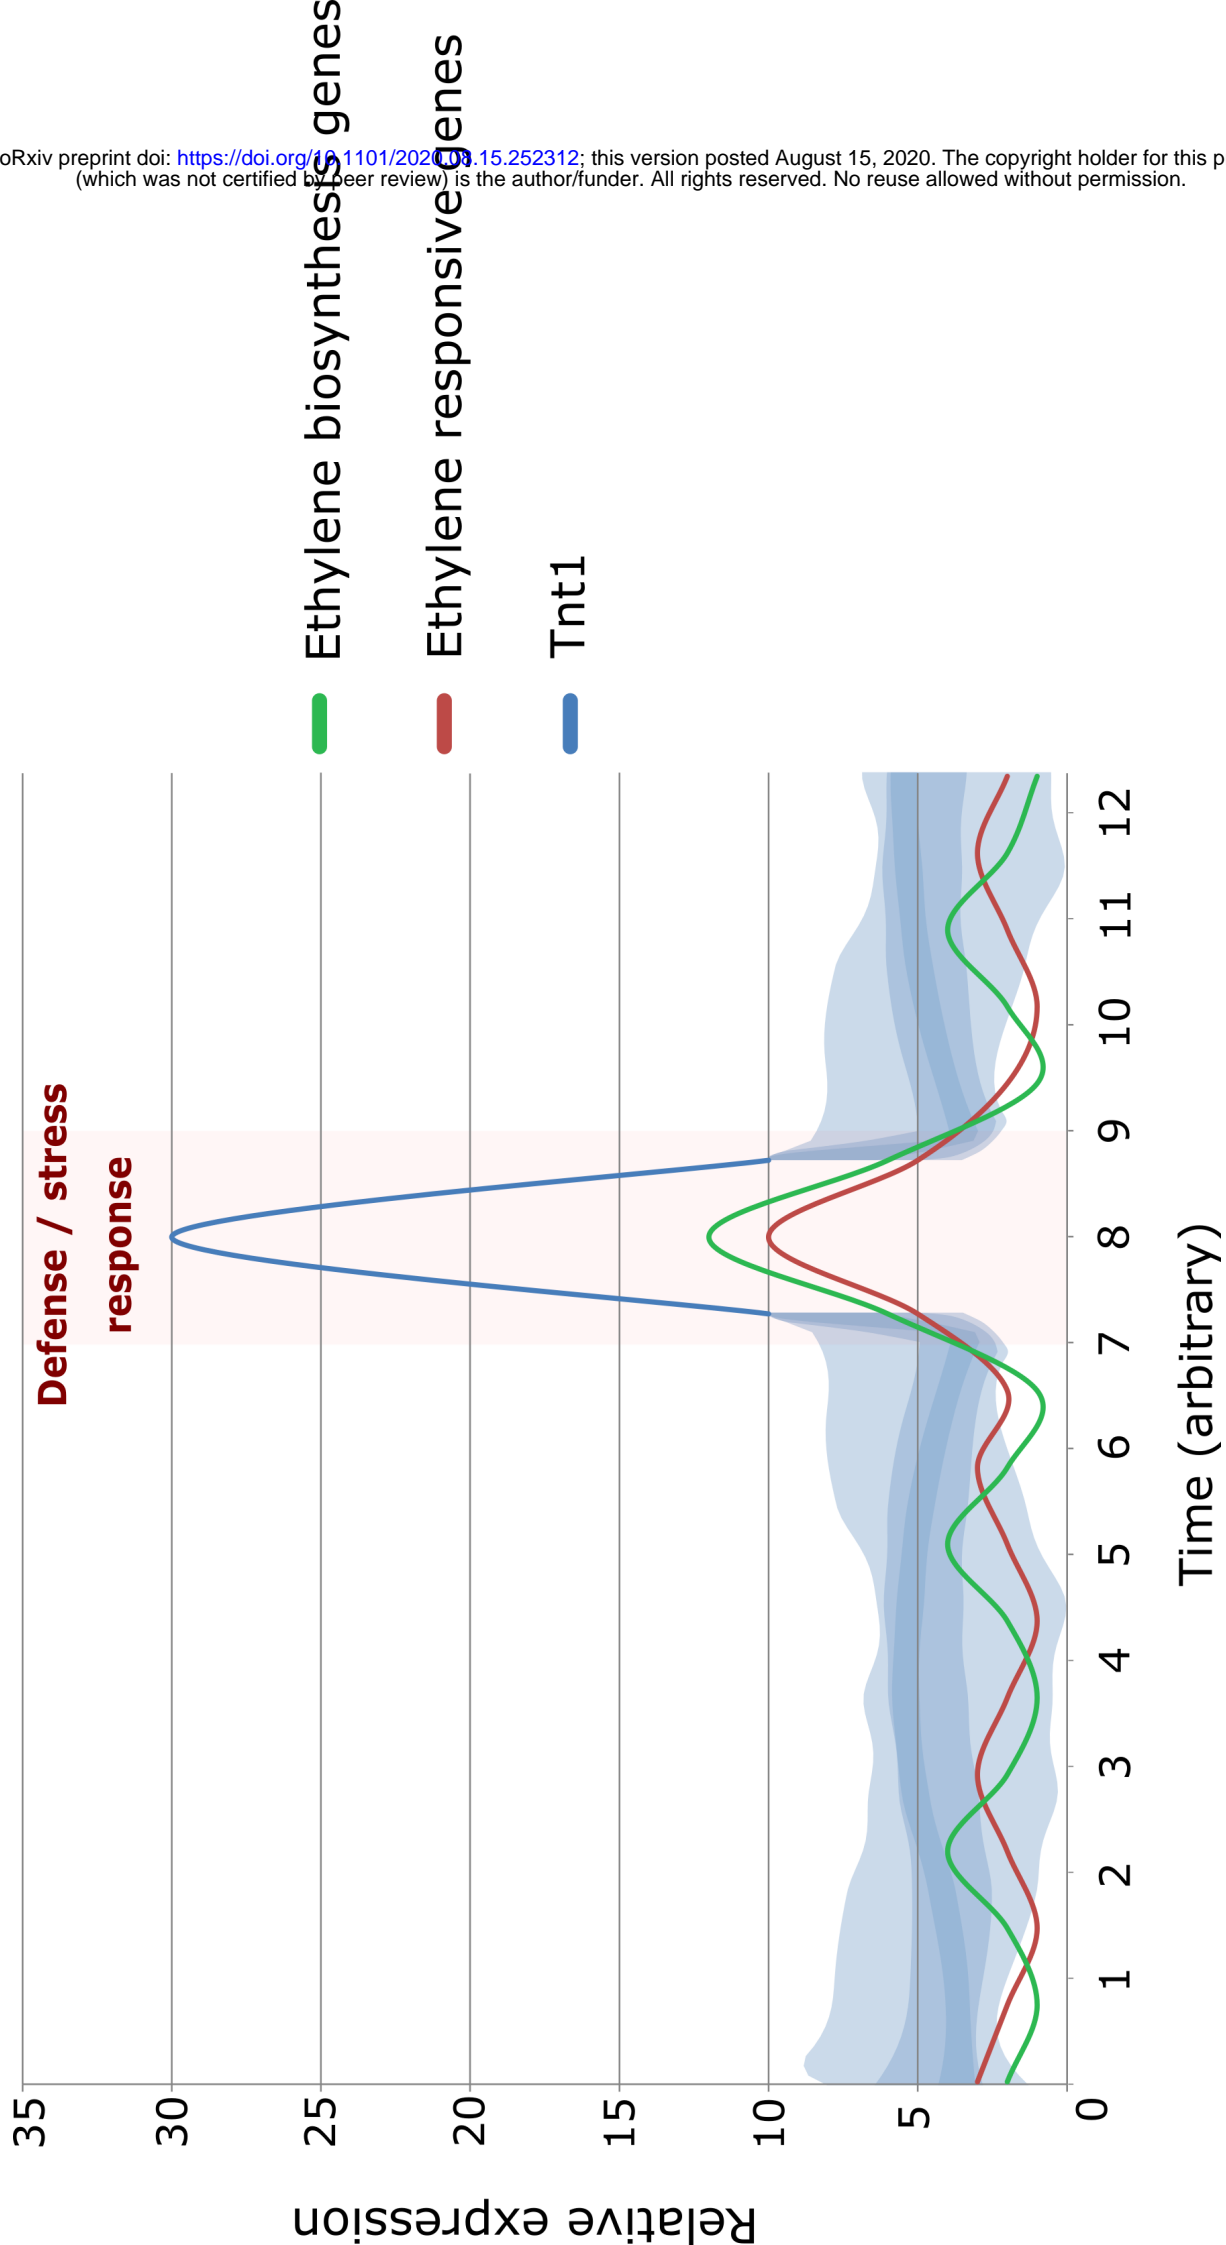

Source: https://www.biorxiv.org/content/biorxiv/early/2020/08/15/2020.08.15.252312.full.pdf
